# Supplementary material
Source: PubMed Central journal article supplement (PMC6637749)
Supplement: NIHMS1015576-supplement-Supplementary_Info.pdf [file NIHMS1015576-supplement-Supplementary_Info.pdf]

## Supporting information

### Structural modification of the 3,4,5-trimethoxyphenyl moiety in the tubulin inhibitor VERU-111 leads to improved antiproliferative activities

Qinghui Wang<sup>†,ϕ,Π</sup>, Kinsie E. Arnst<sup>†,Π</sup>, Yuxi Wang<sup>‡,Π</sup>, Gyanendra Kumar<sup>§</sup>, Dejian Ma<sup>†</sup>, Hao Chen<sup>†</sup>, Zhongzhi Wu<sup>†</sup>, Jinliang Yang<sup>‡</sup>, Stephen W. White<sup>§</sup>, Duane D. Miller<sup>†</sup>, Wei Li<sup>†,\*</sup>

<sup>†</sup>Department of Pharmaceutical Sciences, College of Pharmacy, University of Tennessee Health Science Center, Memphis, TN 38163, United States. <sup>‡</sup>State Key Laboratory of Biotherapy and Cancer Center, West China Hospital, Sichuan University, and Collaborative Innovation Center of Biotherapy, Chengdu, Sichuan 610041, China <sup>§</sup>Department of Structural Biology, St. Jude Children's Research Hospital, Memphis, TN 38105, United States; <sup>ϕ</sup> current address: Department of Pharmacology, Weill Cornell Medicine, Cornell university, New York, NY, 10065, United States

Corresponding author: *wli@uthsc.edu*

### Table of Contents

|                                                                        |        |
|------------------------------------------------------------------------|--------|
| Supplementary figures.....                                             | S2     |
| Spectral data for synthetic intermediates and VERU-111 analogues ..... | S3-S29 |

## Supplementary figures

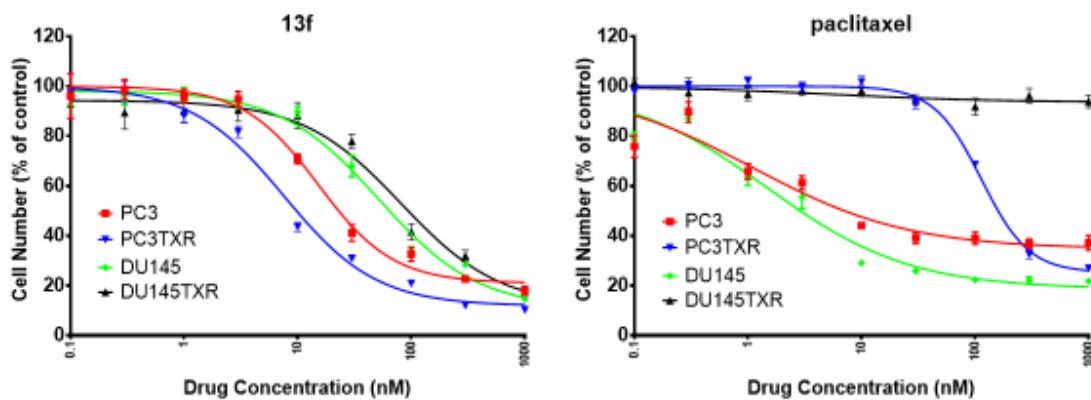

**Figure S1.** Effect of **13f** and paclitaxel on taxane-sensitive or taxane-resistant prostate cancer cell lines.

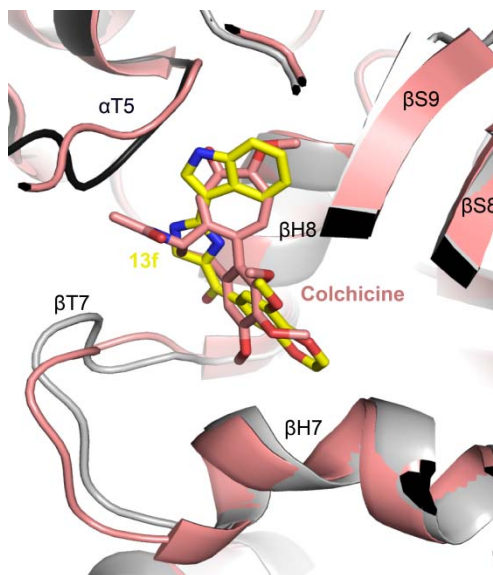

**Figure S2.** A Close up view of the conformational changes at the colchicine-binding sites between colchicine (PDB: 4O2B), and **13f** (PDB code: 6D88). Superimposition of tubulin bound with **13f** bound (shown in yellow) and with colchicine bound (shown in salmon).

# Spectral data for synthetic intermediates and VERU-111 analogues

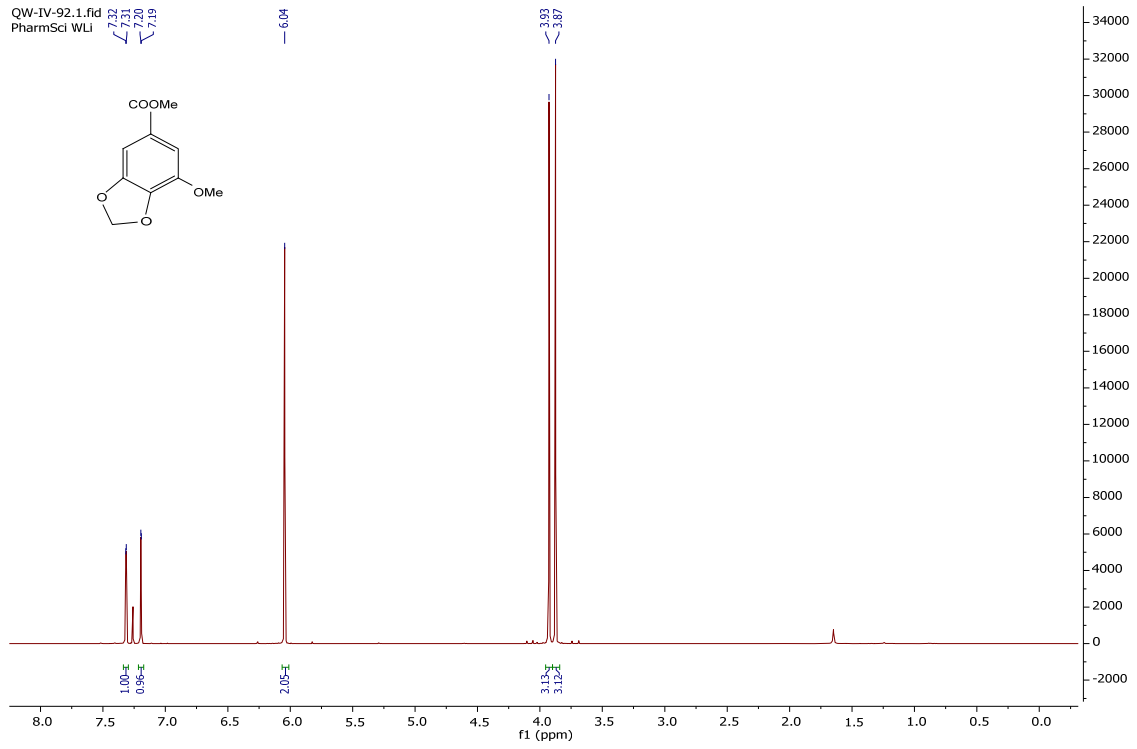

<sup>1</sup>H-NMR of 1a

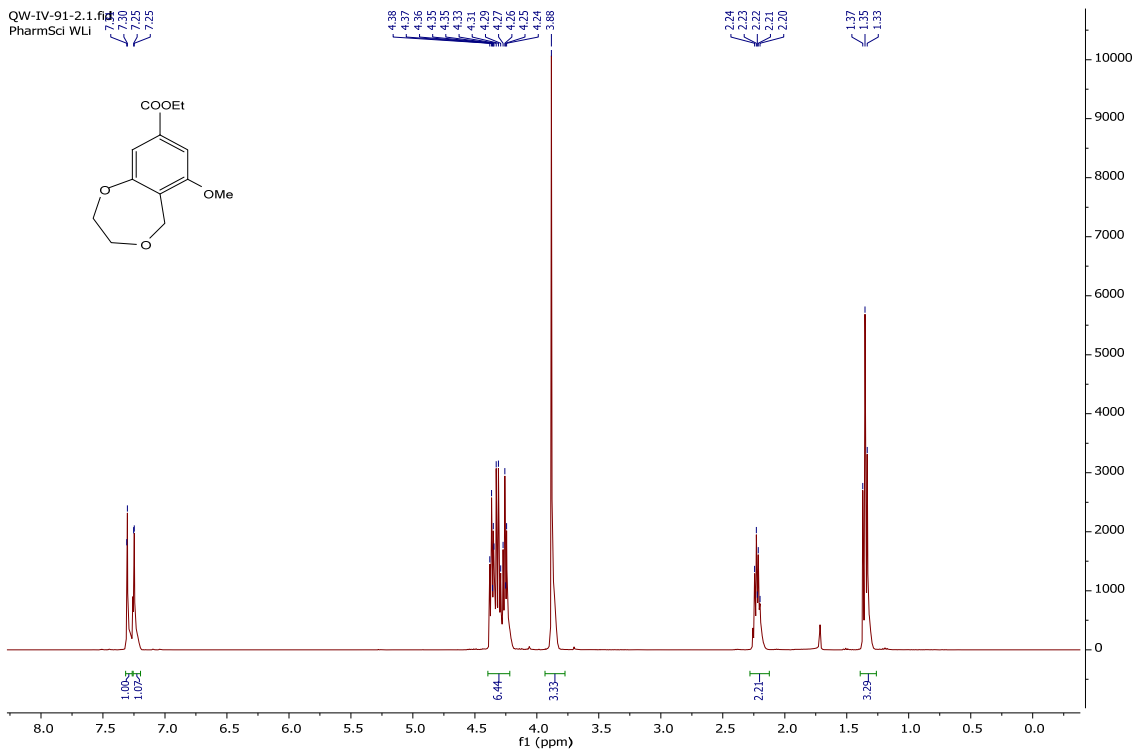

<sup>1</sup>H-NMR of 1b

QW-IV-93.1.fid  
PharmSci WLi

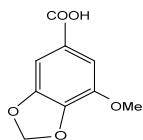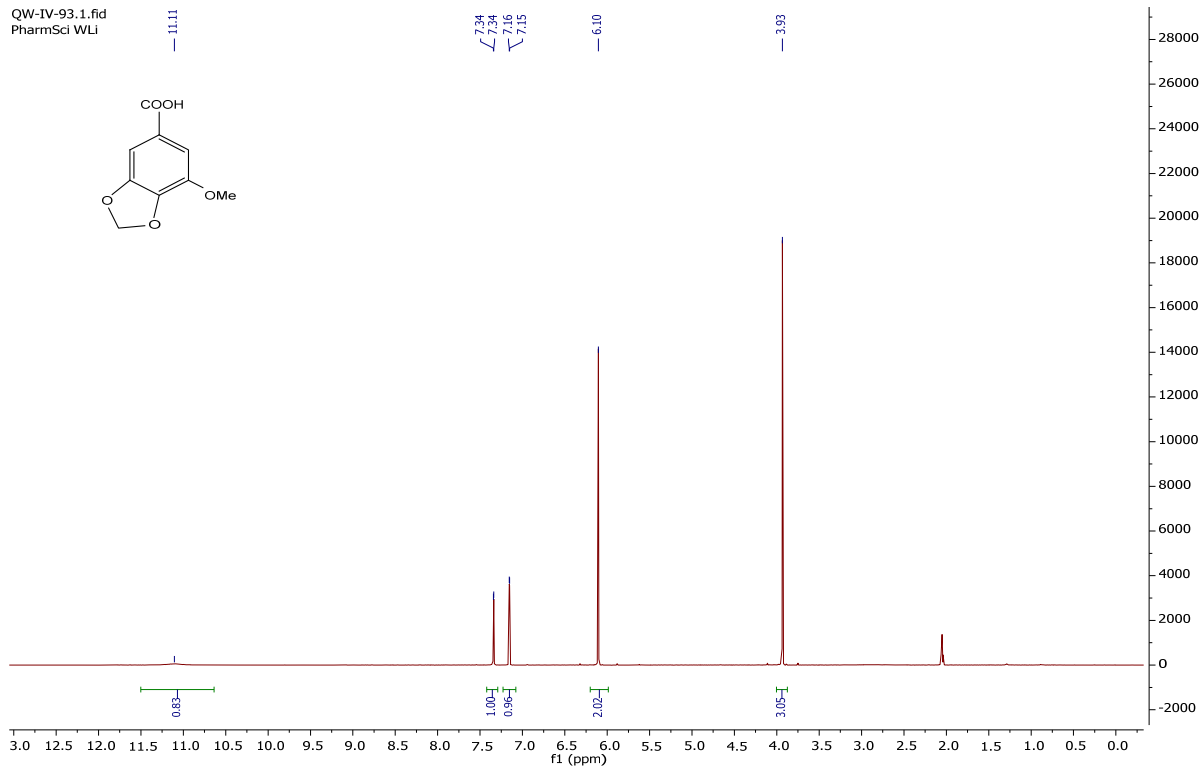

<sup>1</sup>H-NMR of 2a

QW-IV-94.1.fid  
PharmSci WLi

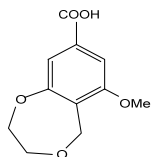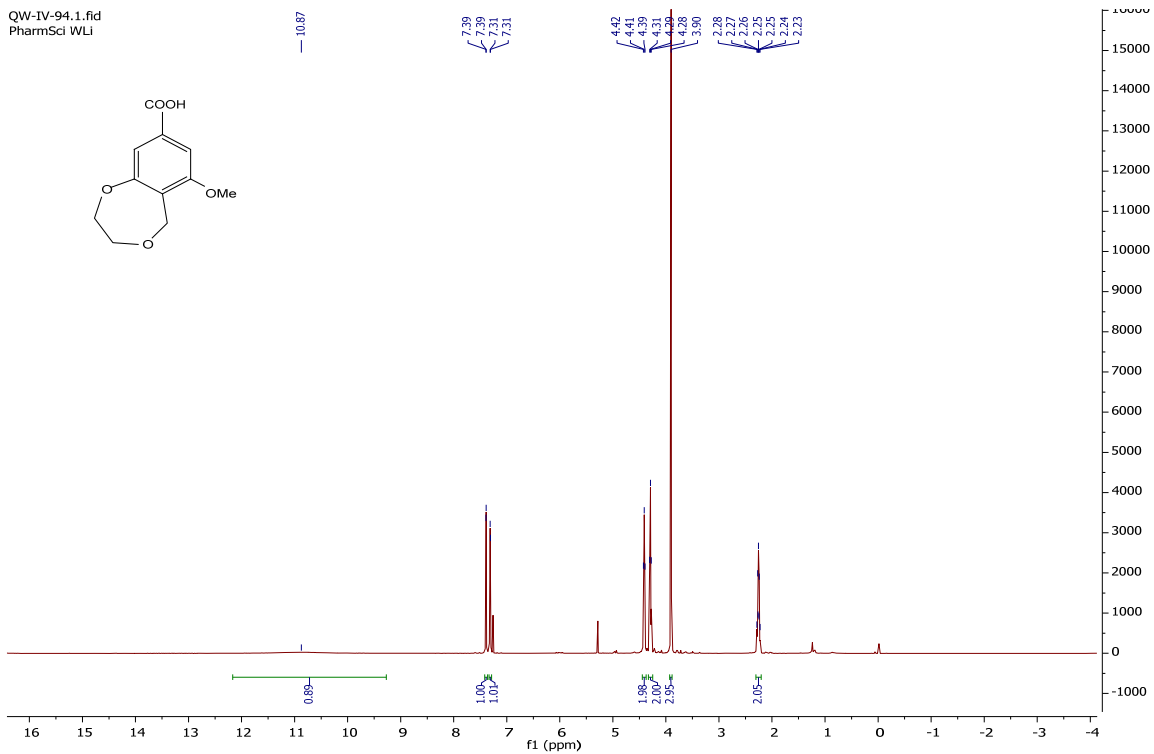

<sup>1</sup>H-NMR of 2b

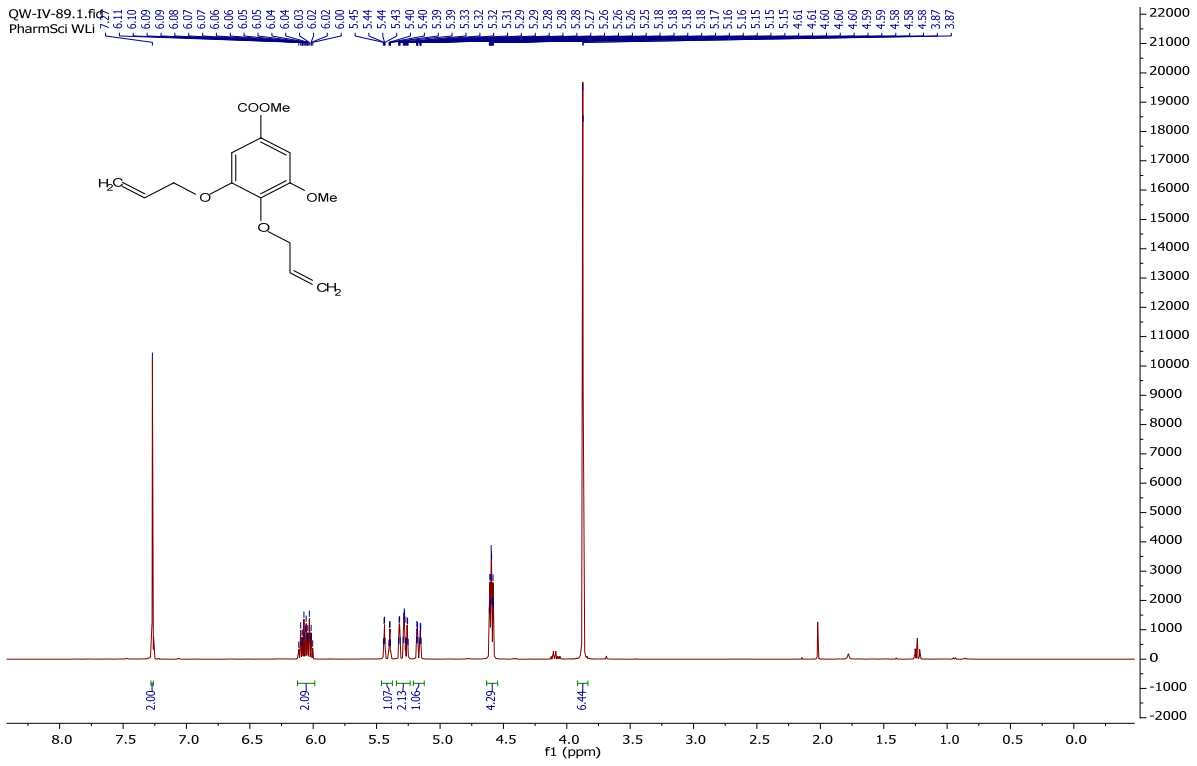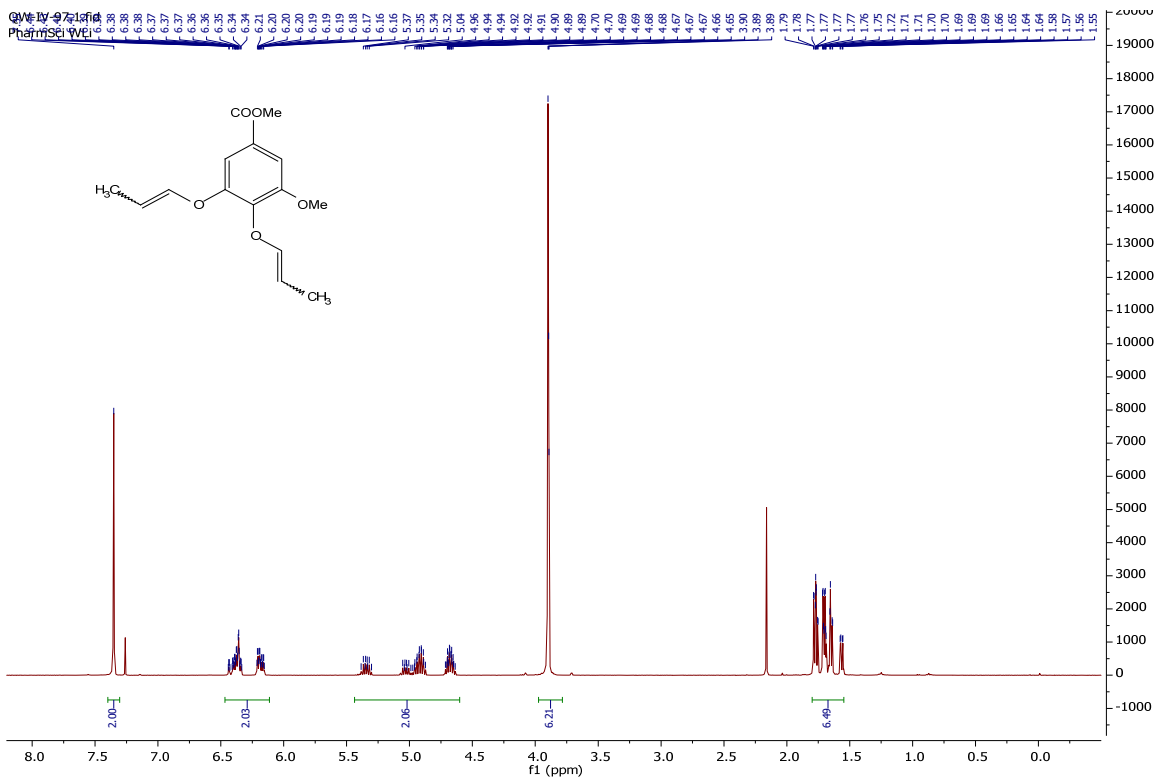

QW-IV-101.1.fid  
PharmSci WLI

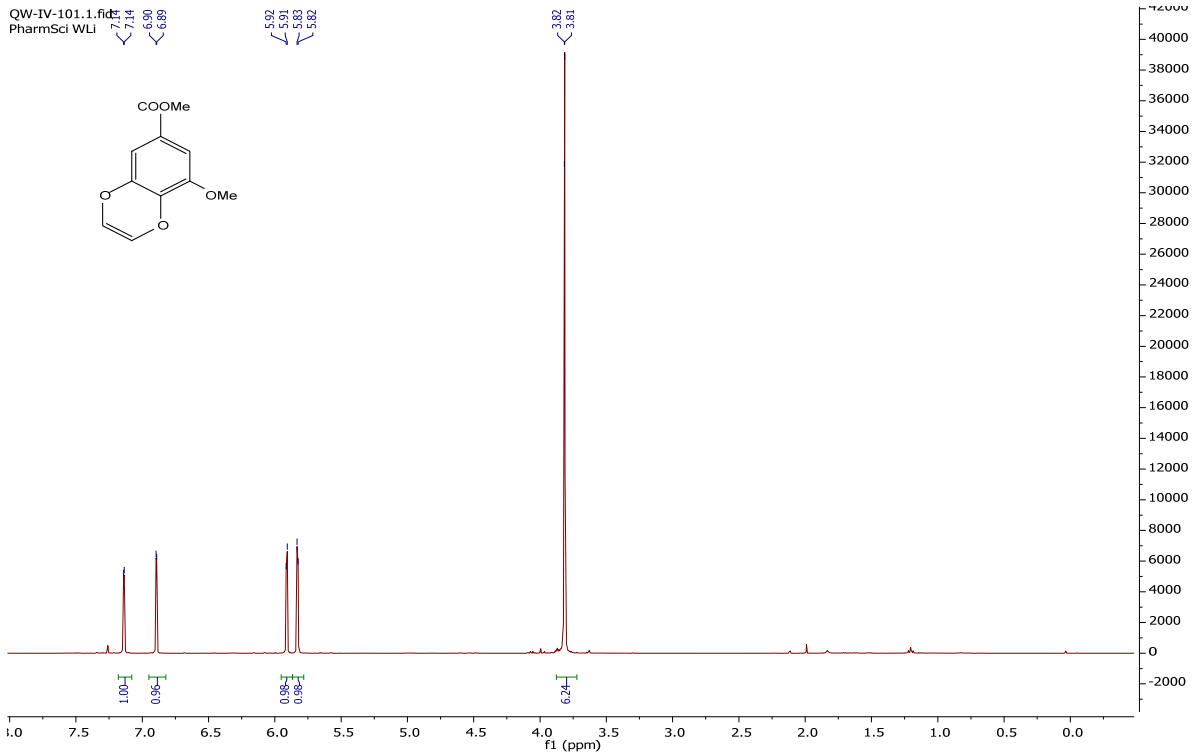

<sup>1</sup>H-NMR of 6

QW-IV-104.10.fid  
PharmSci WLI

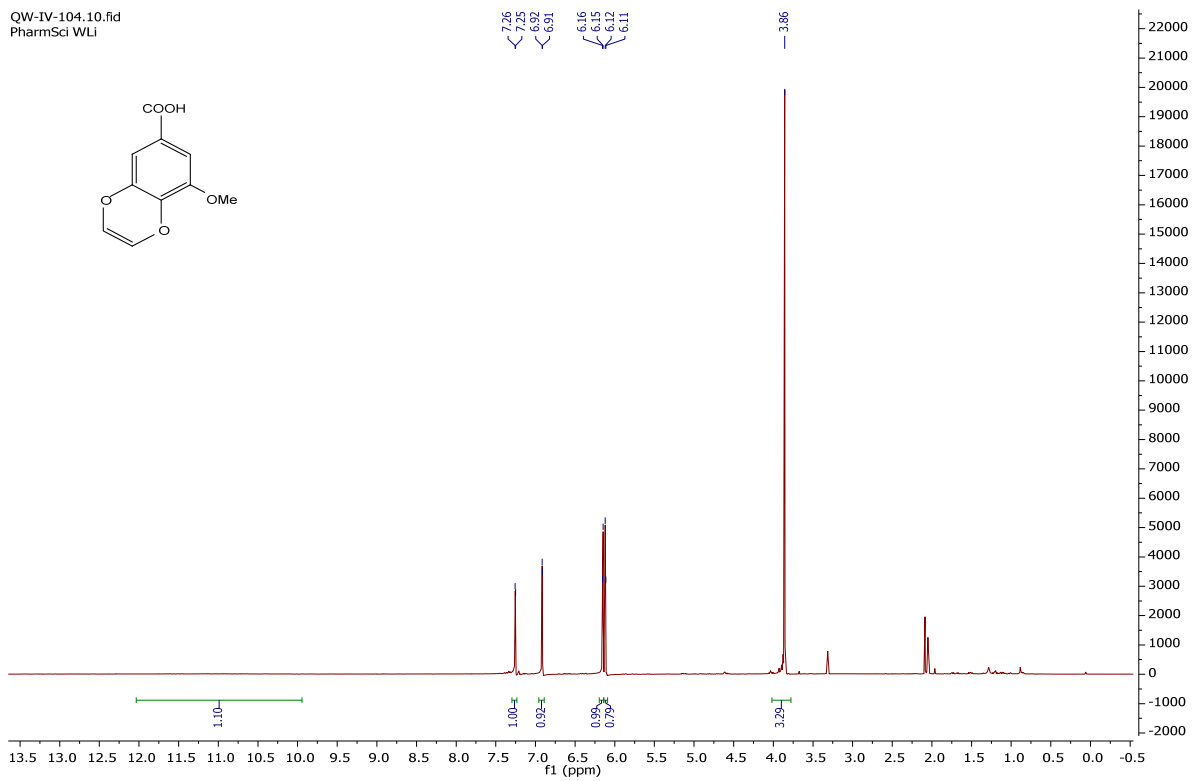

<sup>1</sup>H-NMR of 7

QW-III-243.1.fid  
PharmSci WLI

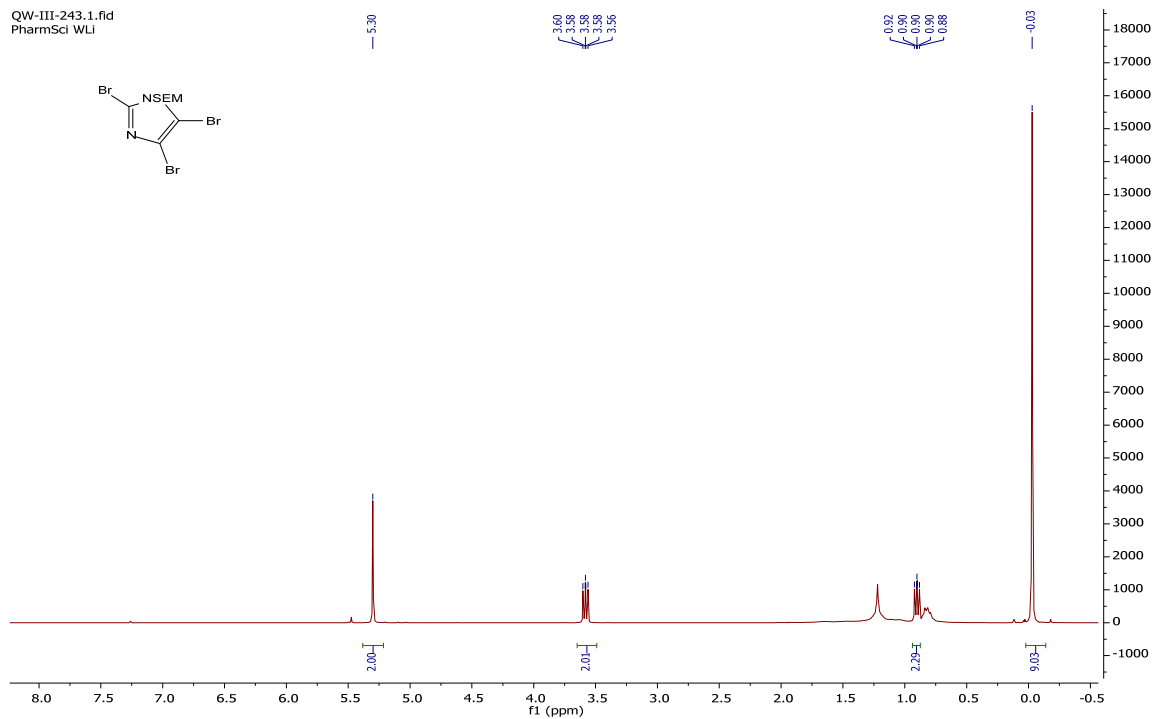

$^1\text{H-NMR}$  of 9

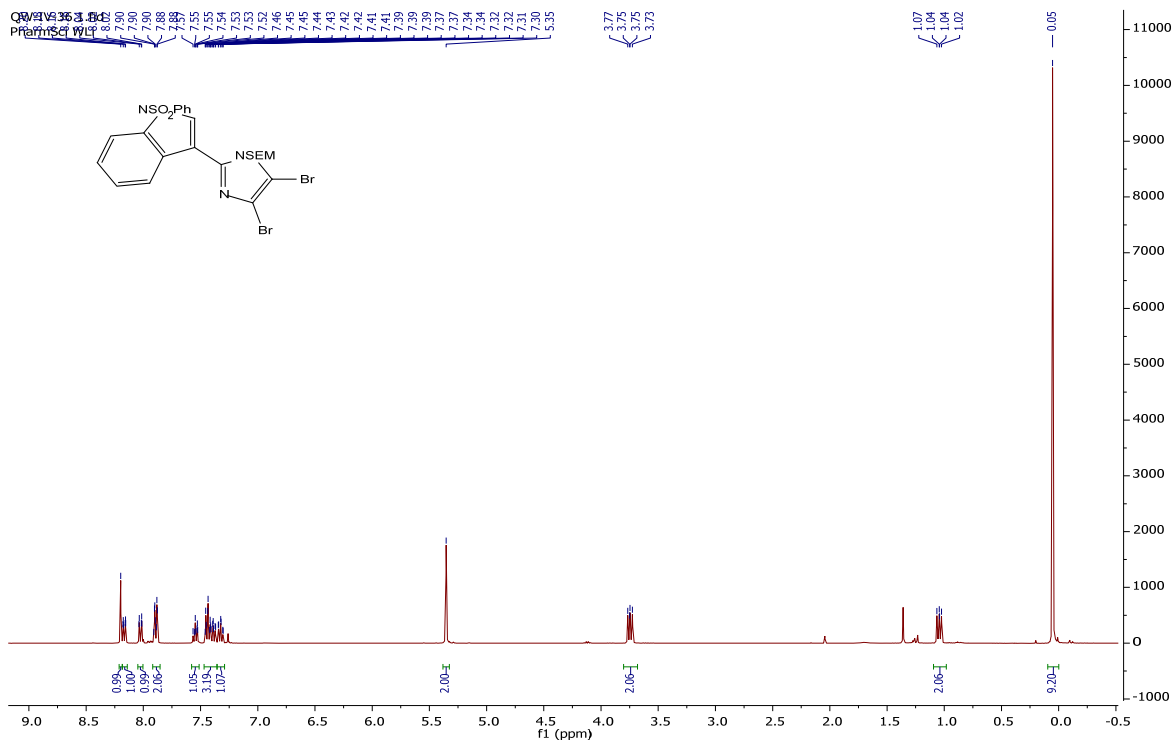

$^1\text{H-NMR}$  of 10





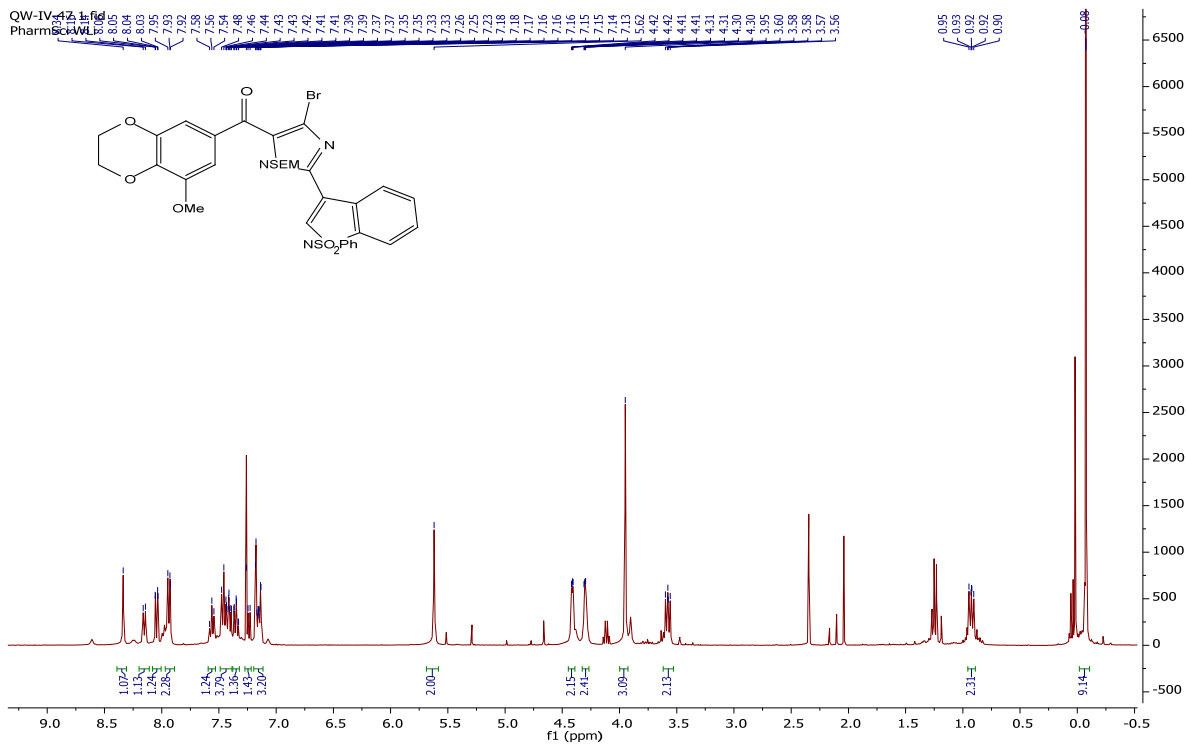

<sup>1</sup>H-NMR of 11c

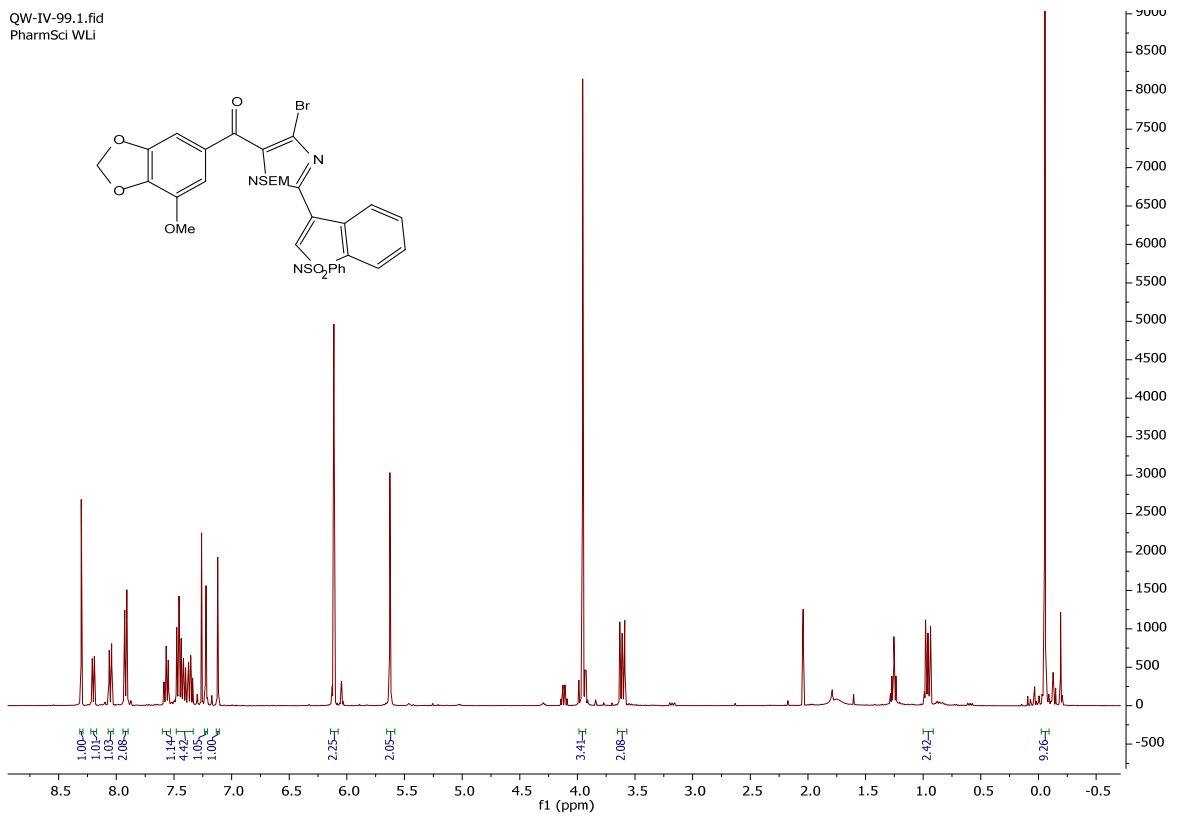

<sup>1</sup>H-NMR of 11d

QW-IV-100.1.fid  
PharmSci WLI

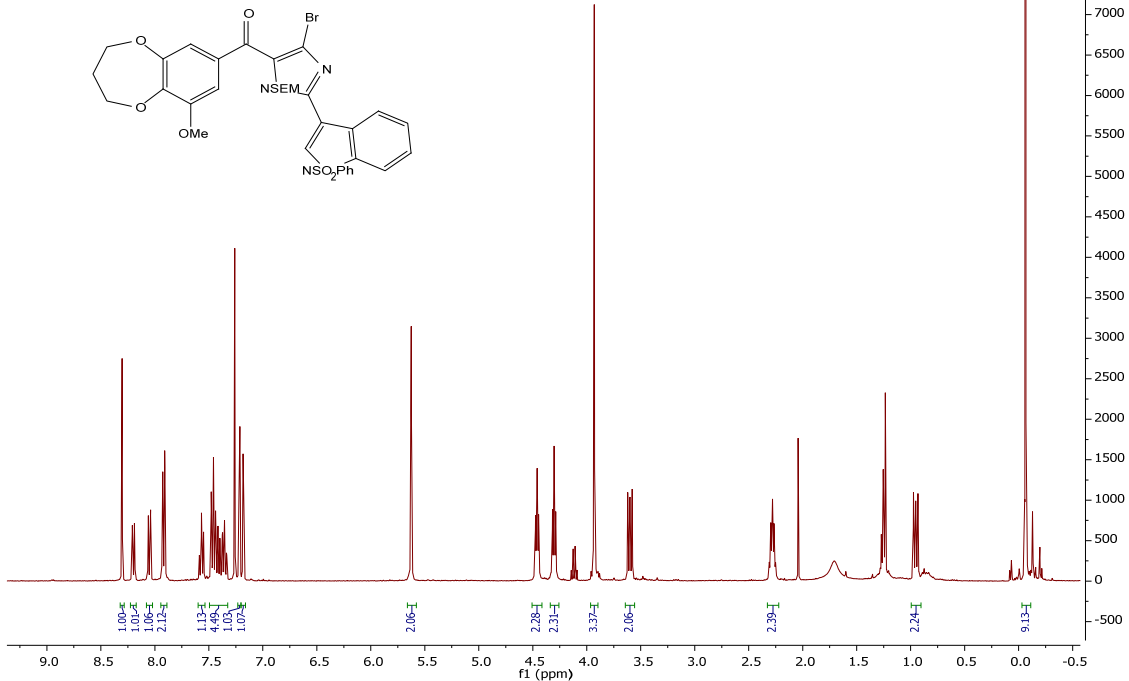

<sup>1</sup>H-NMR of 11e

QW-IV-110.1.fid  
PharmSci WLI

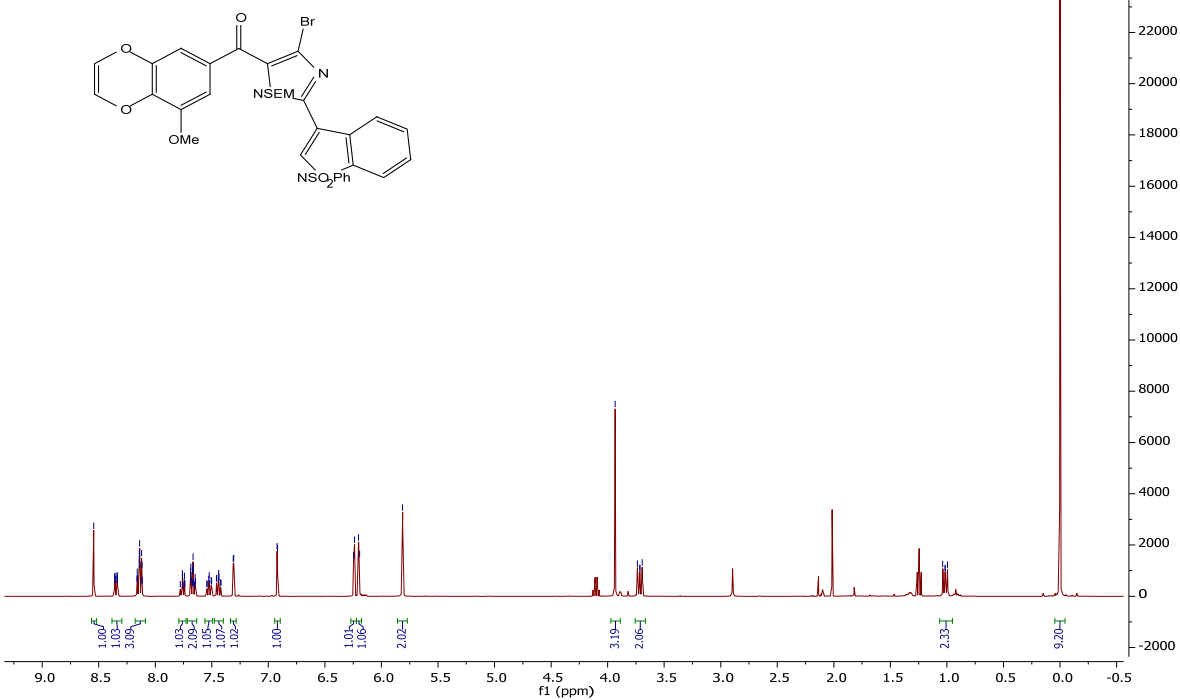

<sup>1</sup>H-NMR of 11f

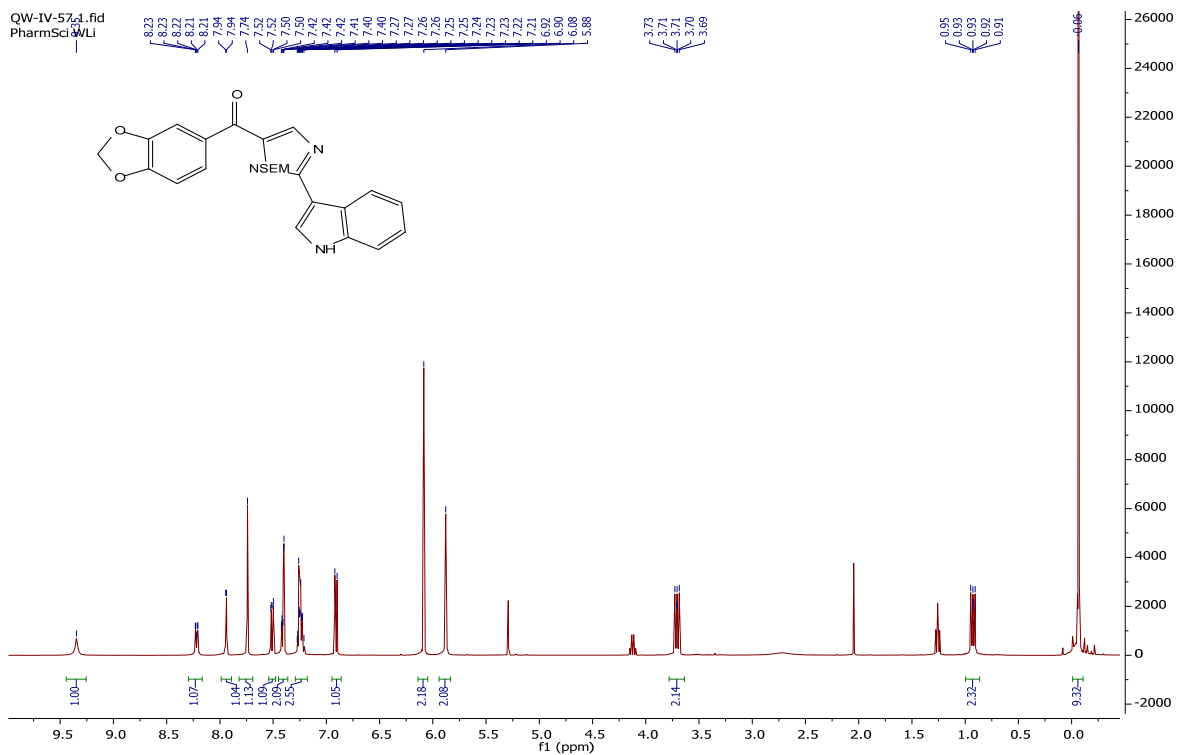

<sup>1</sup>H-NMR of 12b

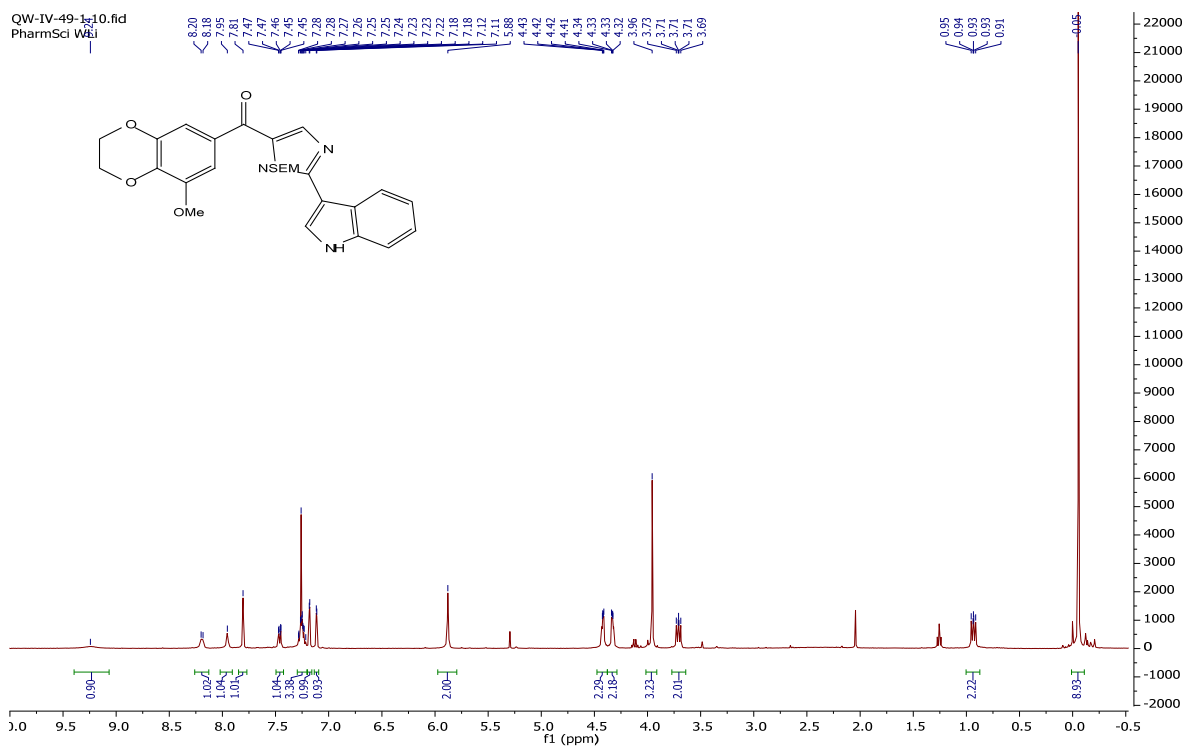

<sup>1</sup>H-NMR of 12c





QW-IV-63.2.fid  
PharmSci WLI

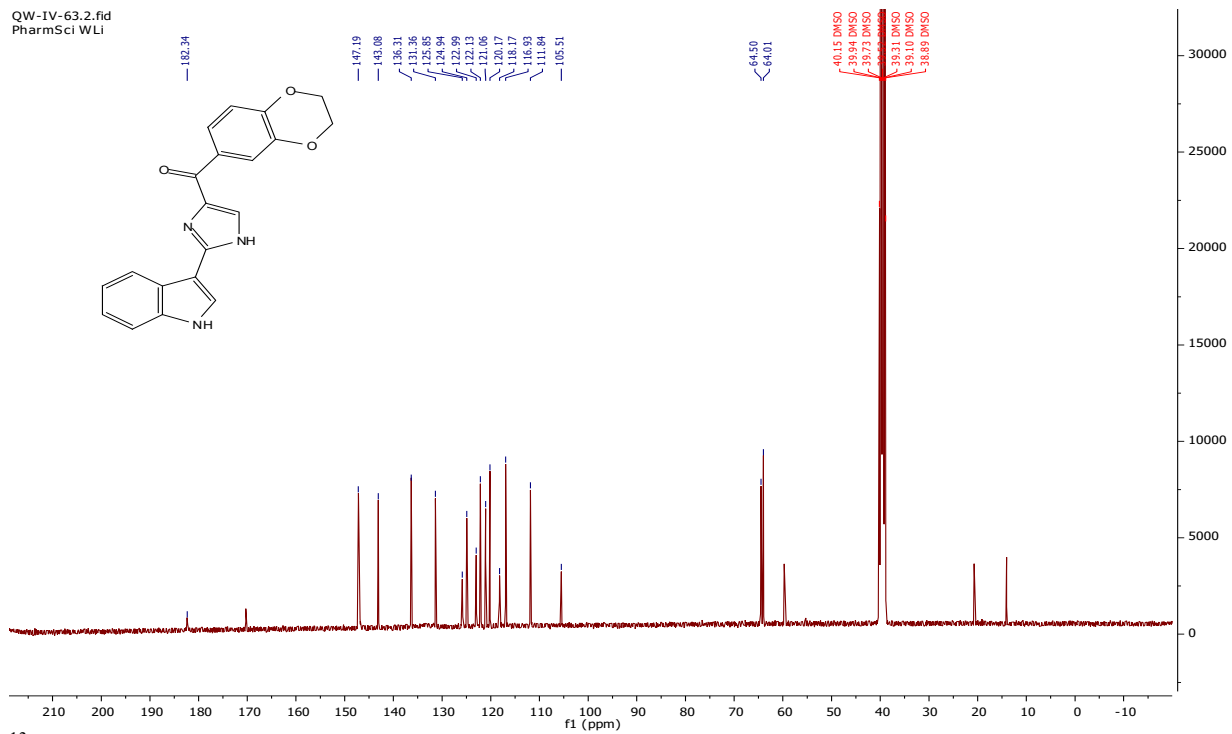

QW-IV-63 82 (1.749)

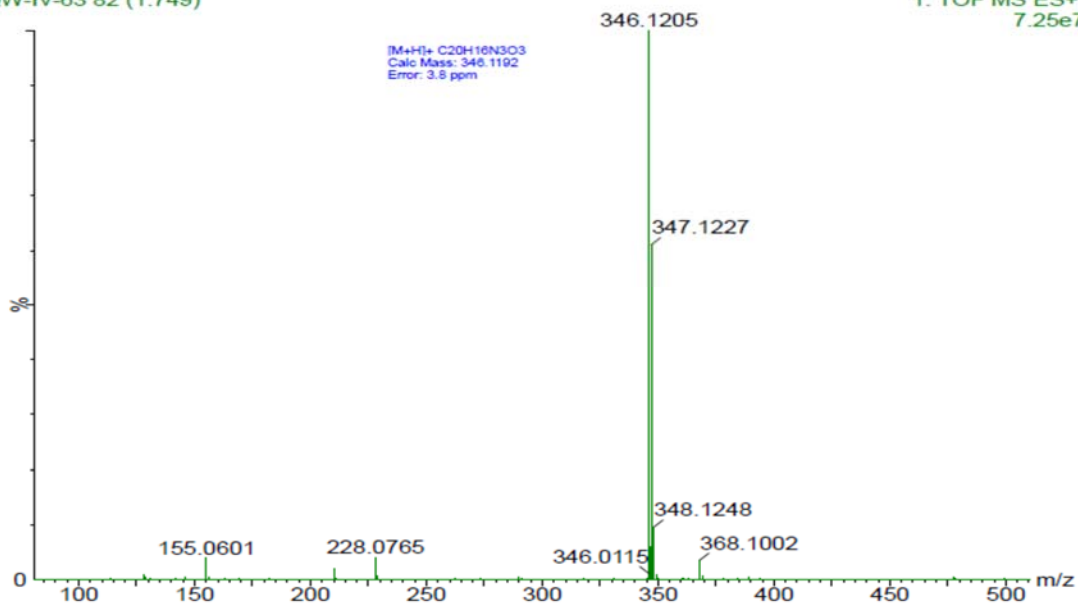

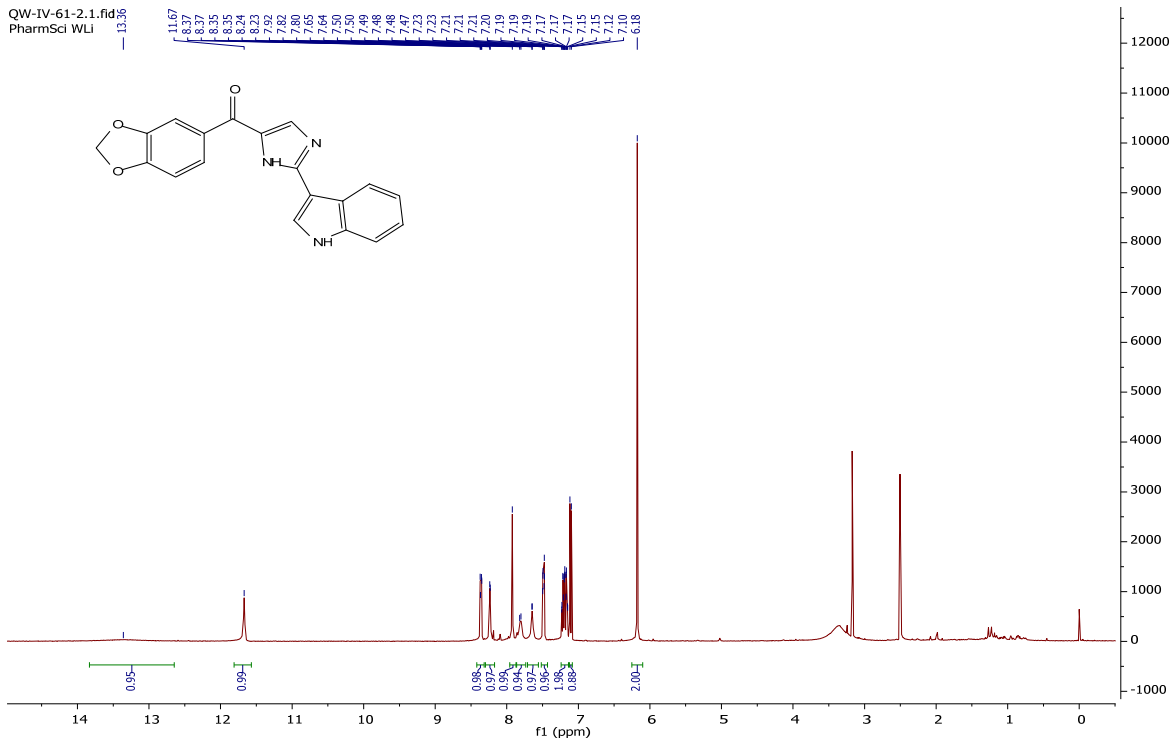

<sup>1</sup>H-NMR of 13b

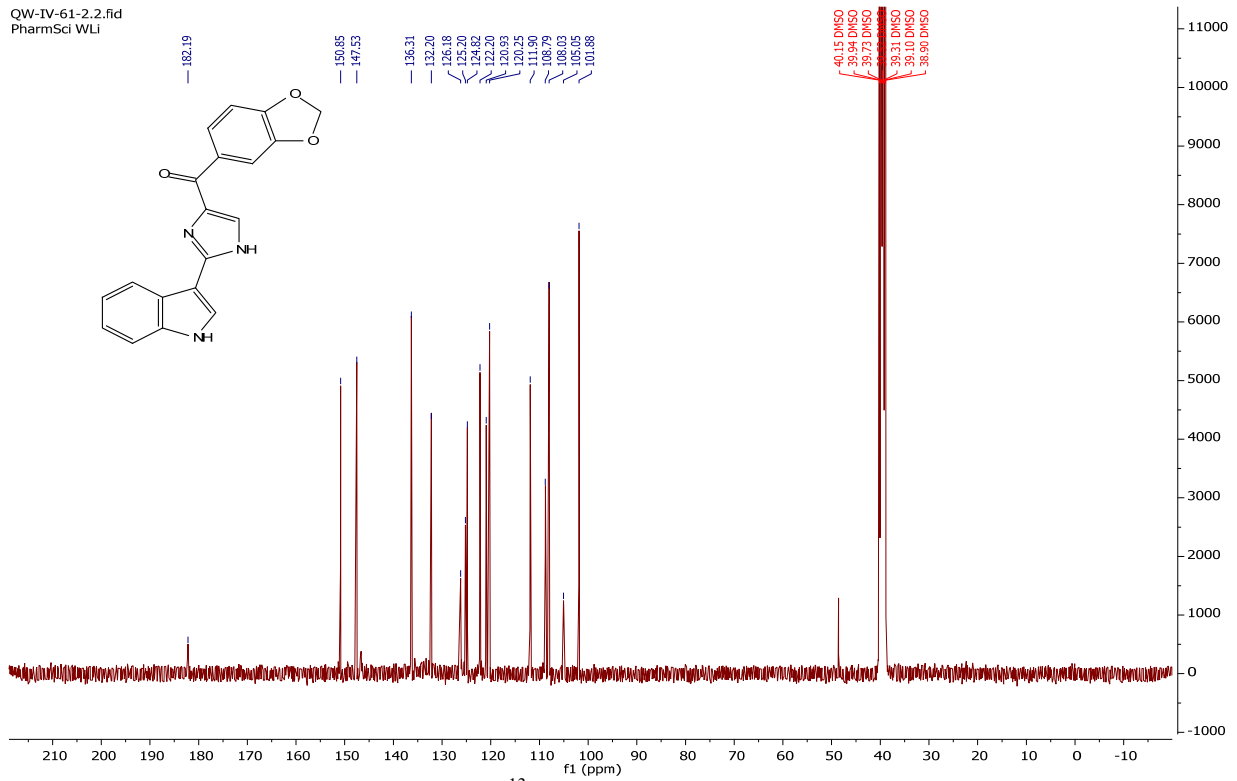

<sup>13</sup>C-NMR of 13b

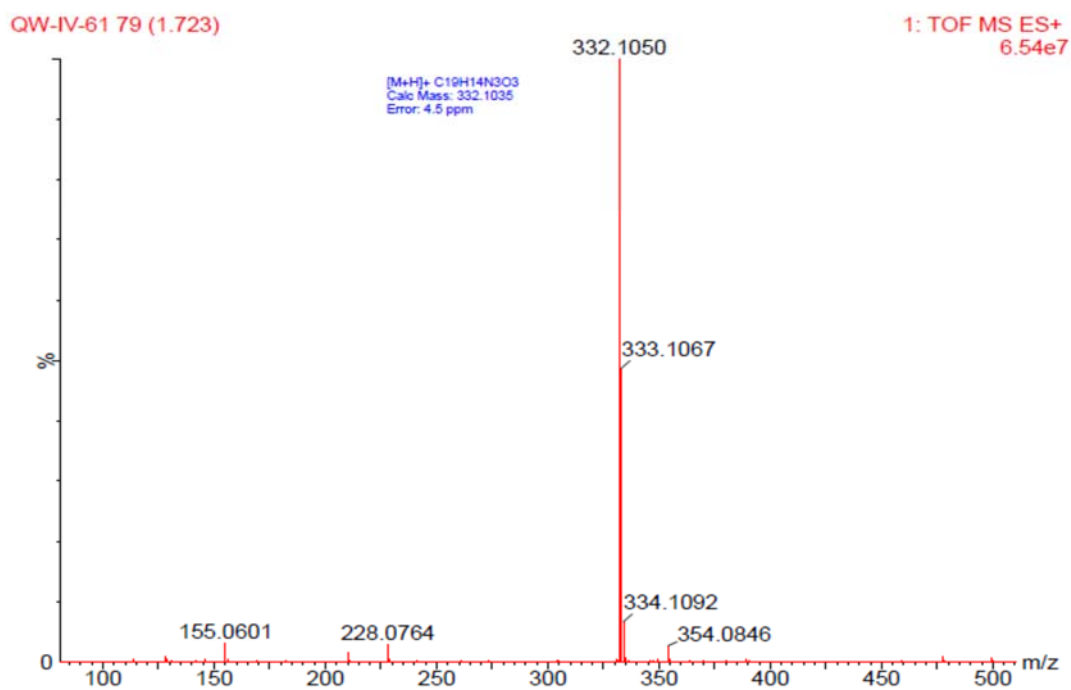

### HR-MS of 13b

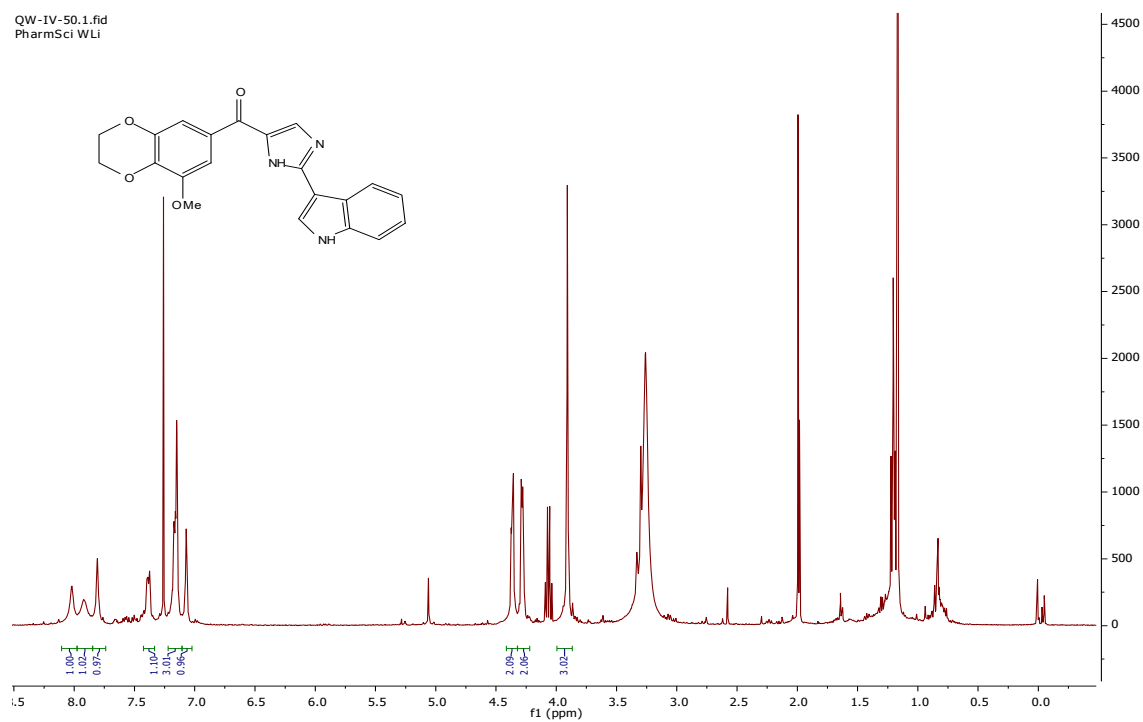

### <sup>1</sup>H-NMR of 13c



Jun29-2018-djma\_S1.11.fid  
PharmSci Dept

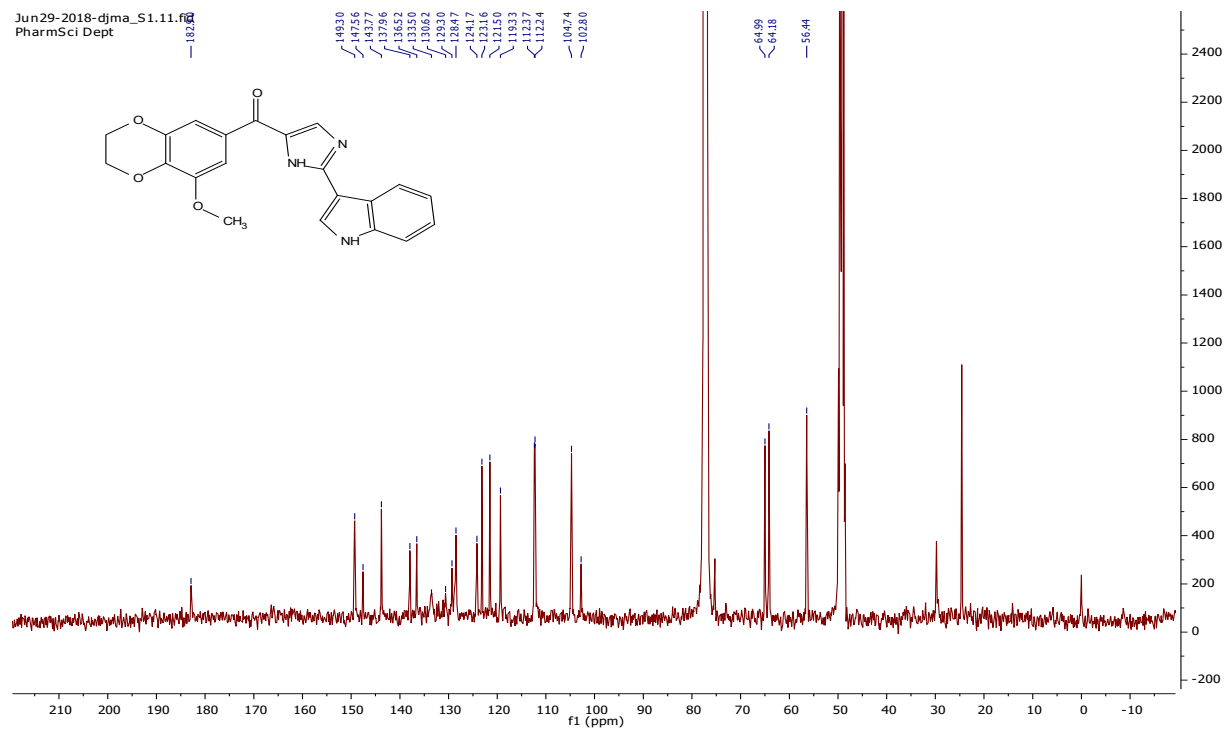

<sup>13</sup>C-NMR of 13c

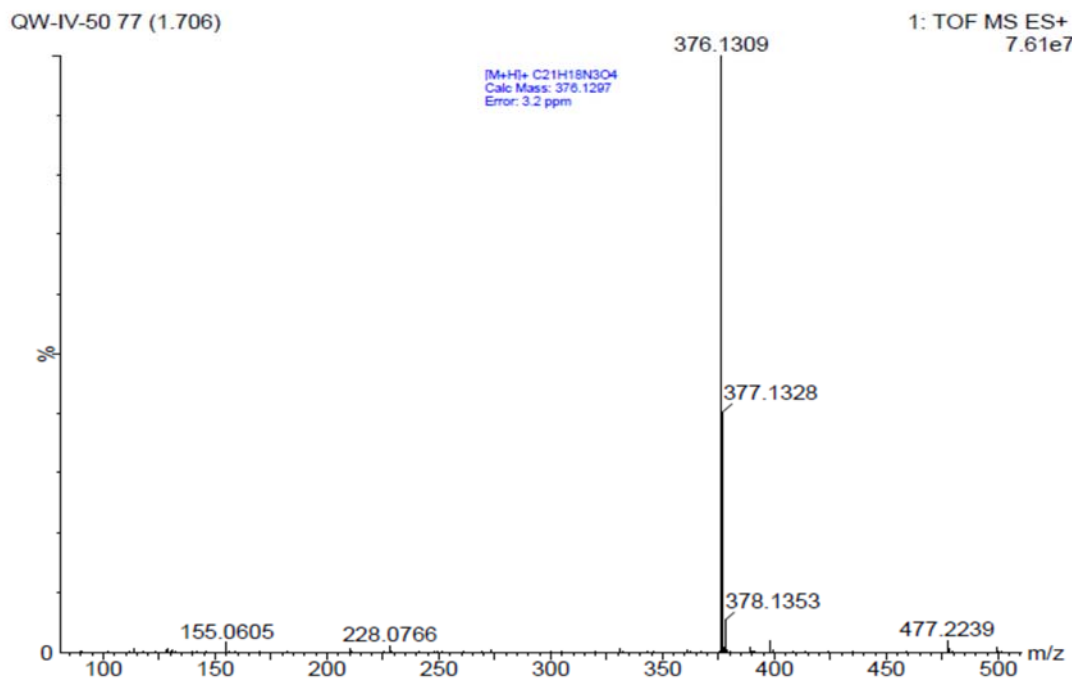

HR-MS of 13c

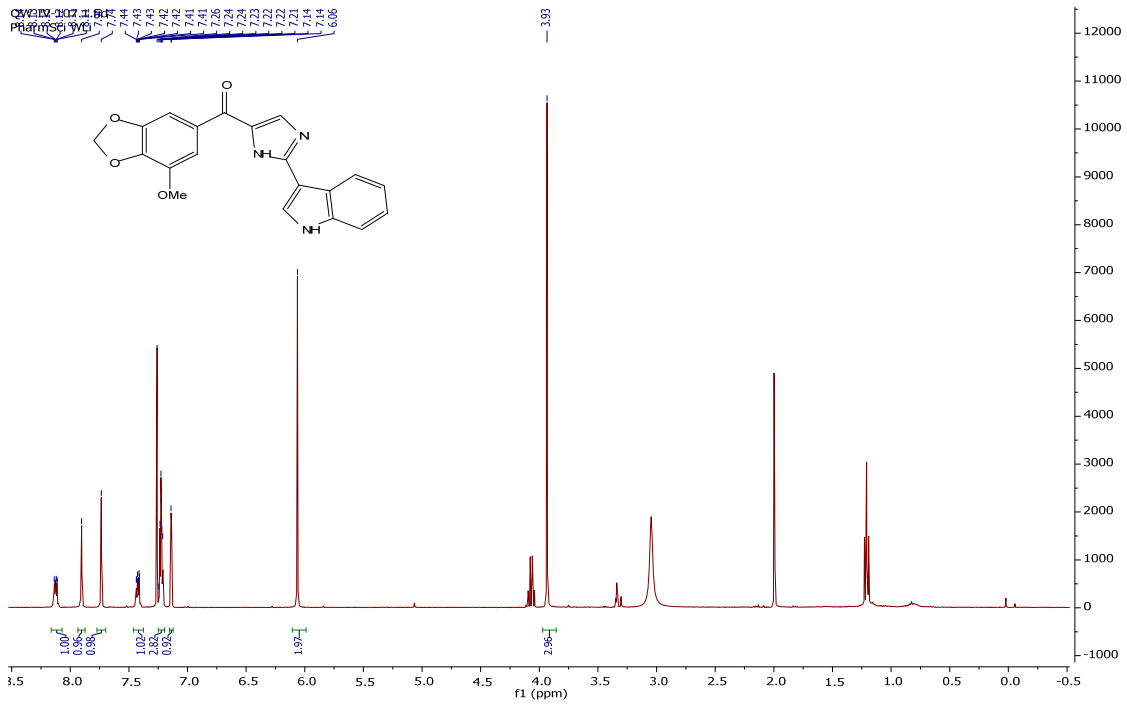

<sup>1</sup>H-NMR of 13d

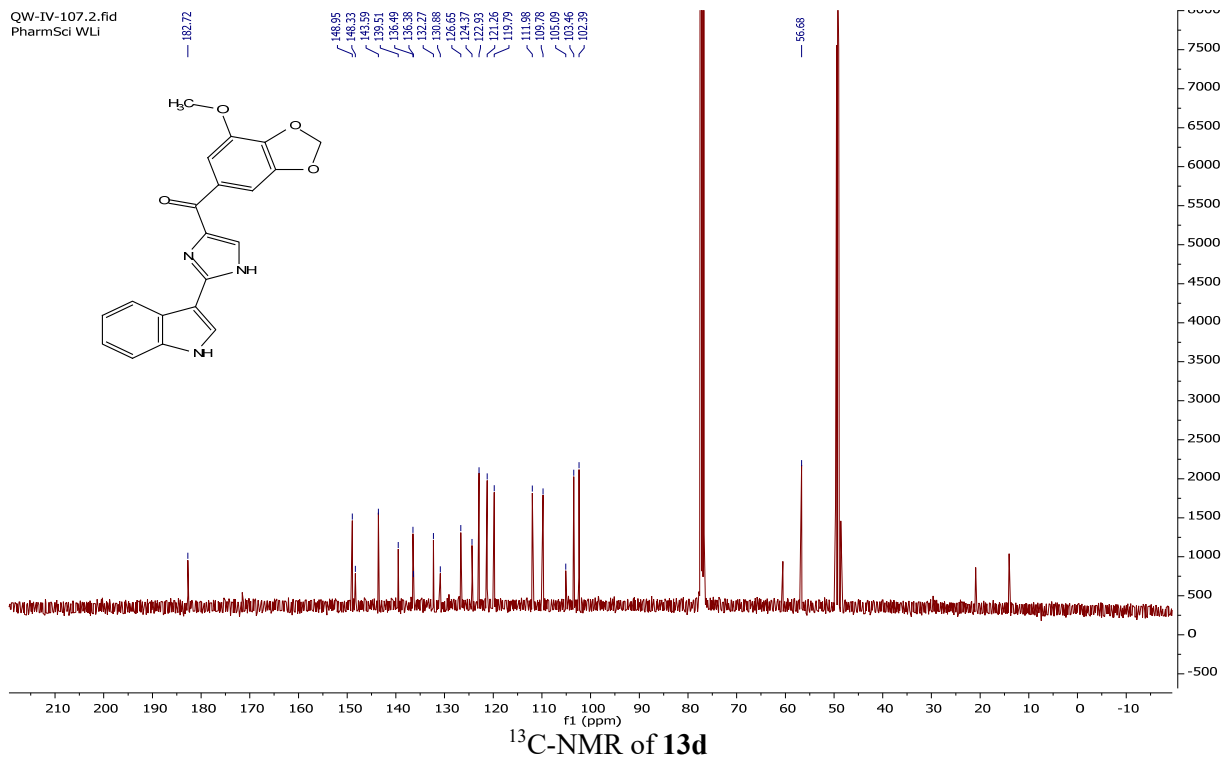

<sup>13</sup>C-NMR of 13d

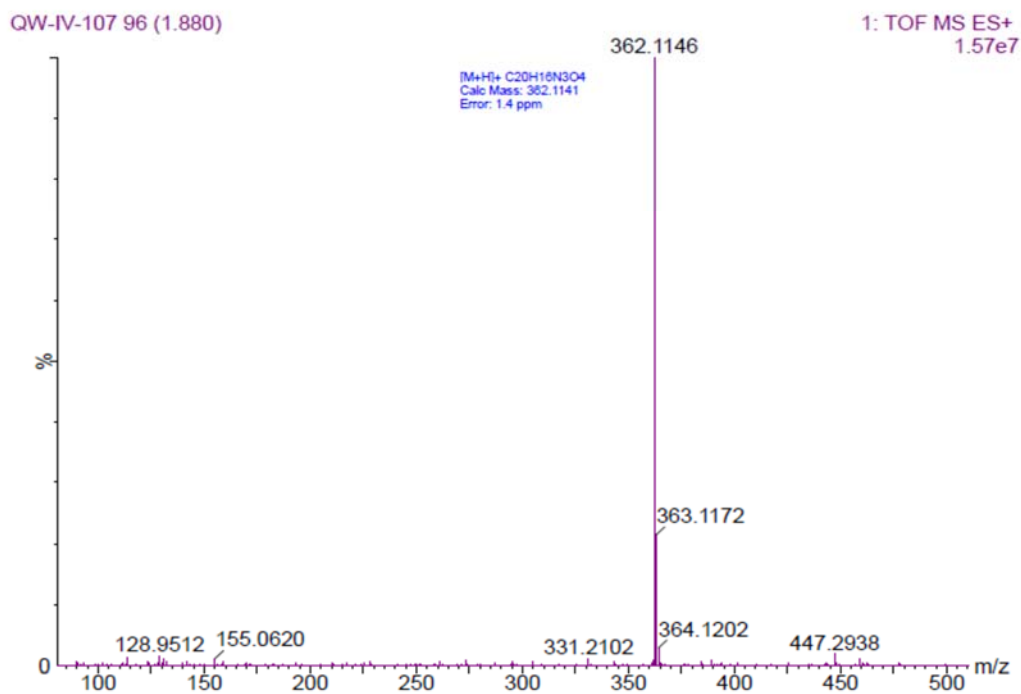

HR-MS of 13d

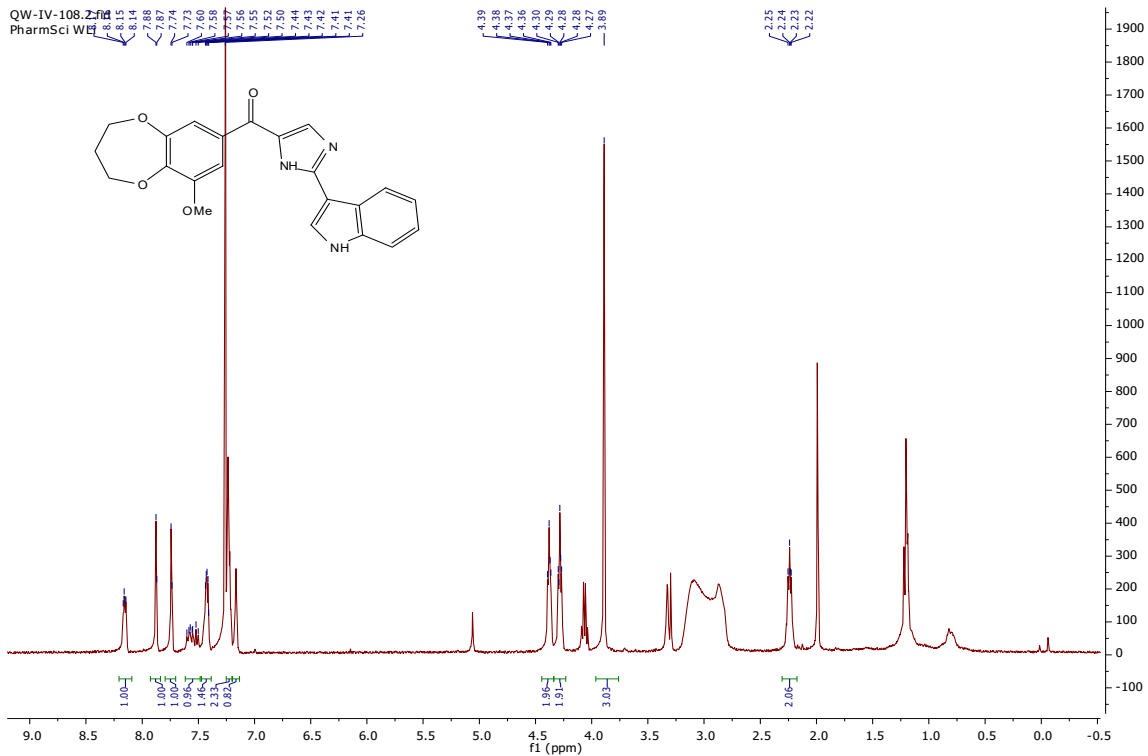

<sup>1</sup>H-NMR of 13e

QW-IV-108.3.fid  
PharmSci WLi

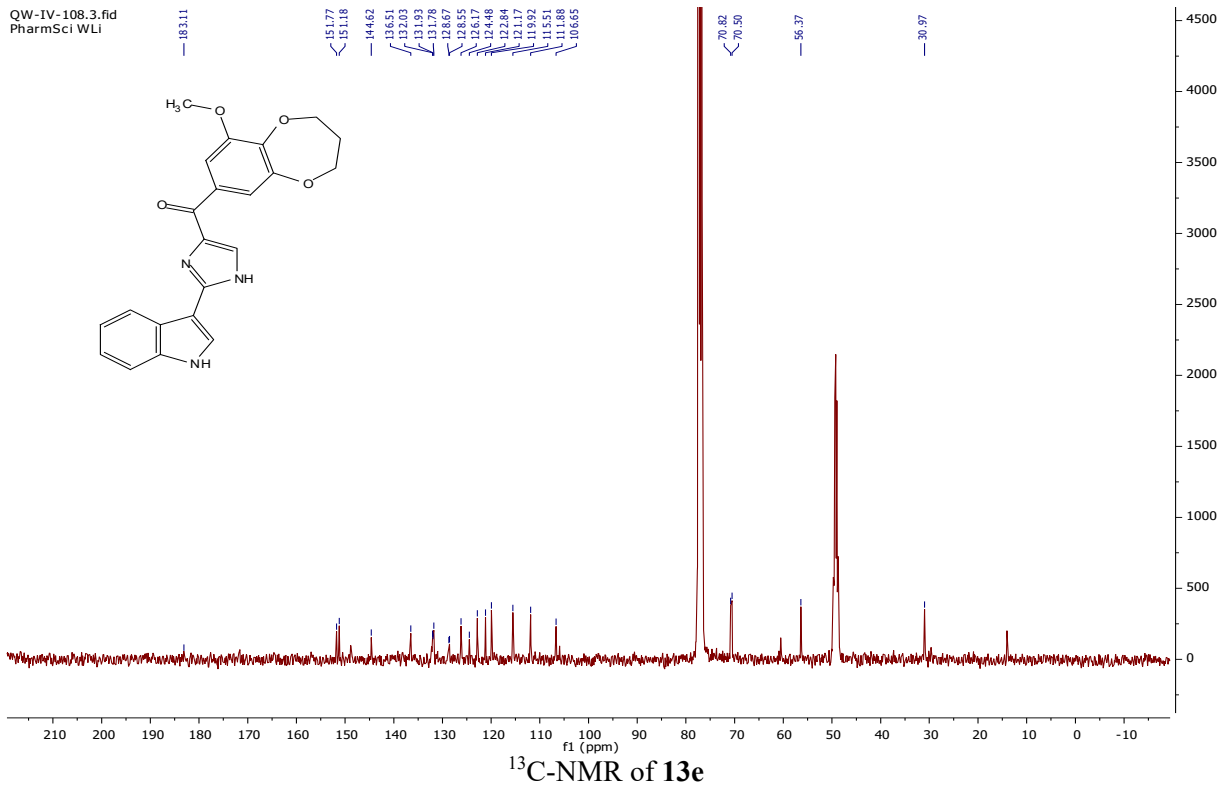

QW-IV-108 86 (1.783)

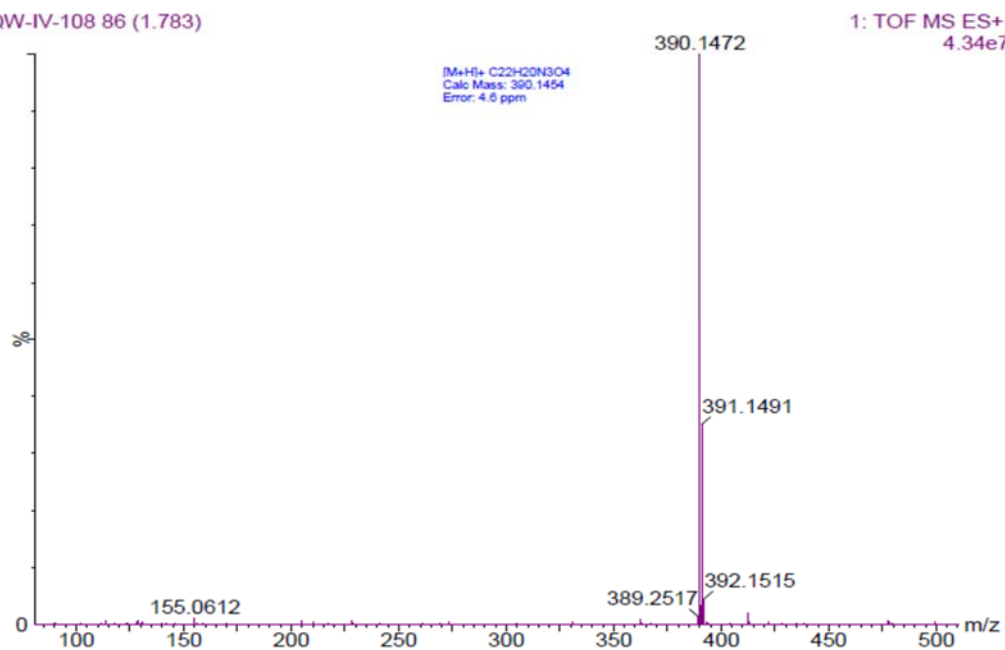

HR-MS of **13e**

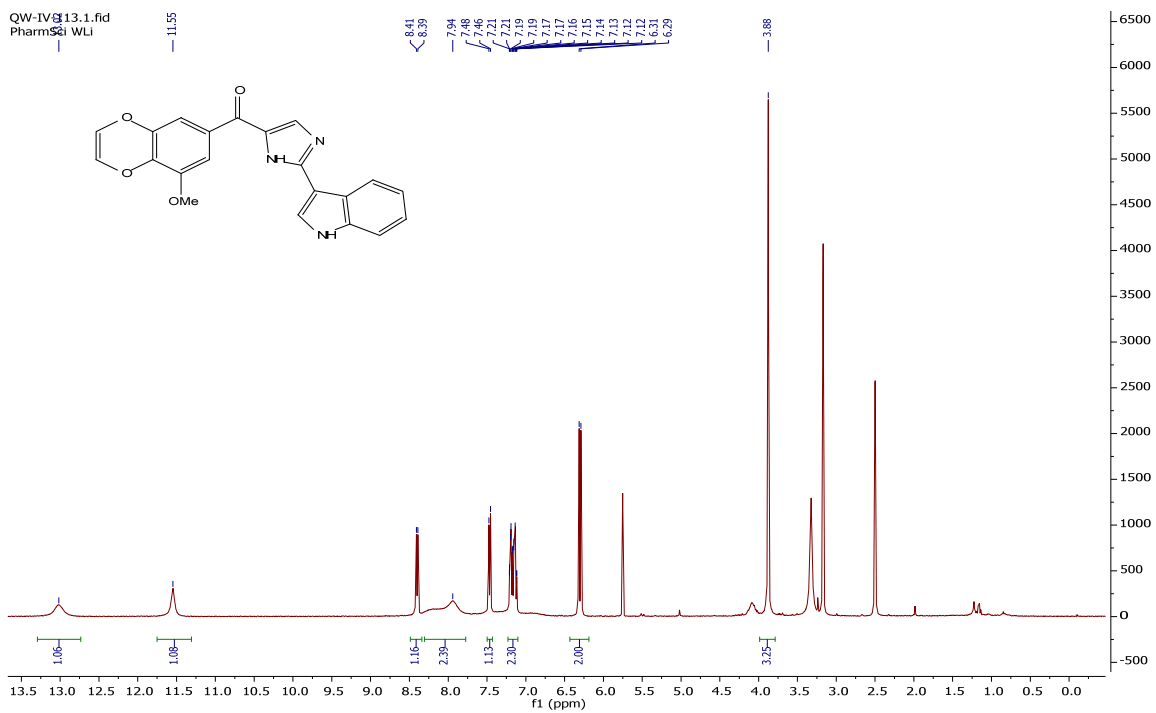

<sup>1</sup>H-NMR of 13f

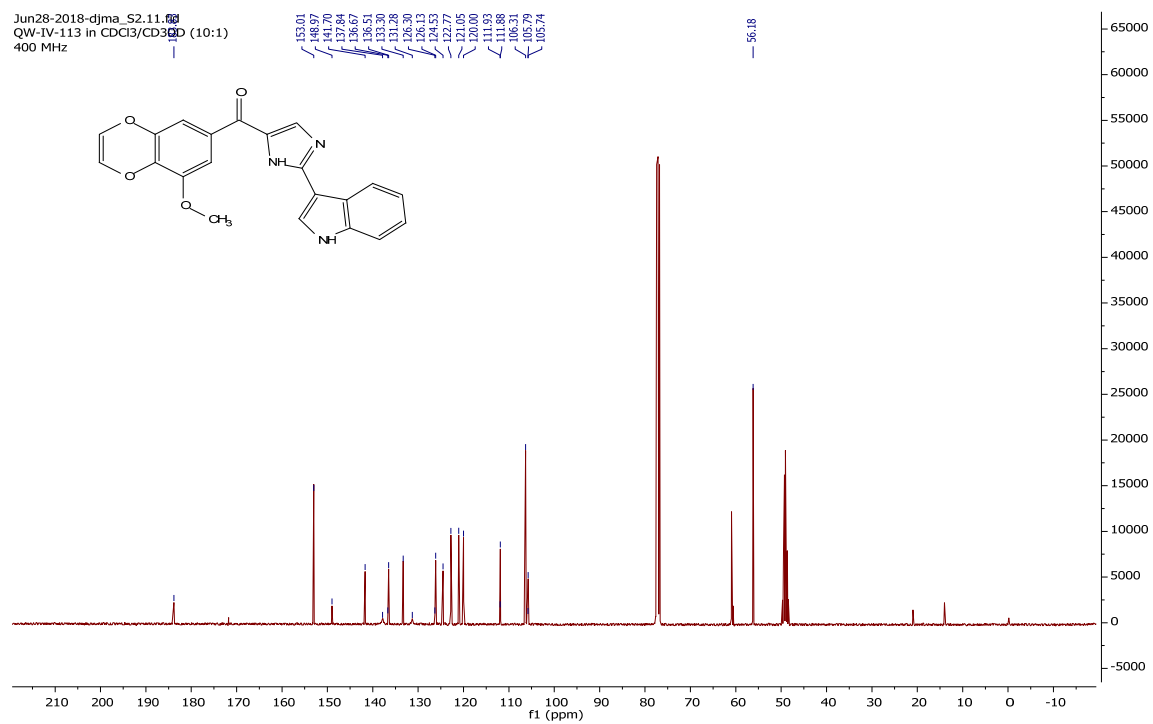

<sup>13</sup>C-NMR of 13f



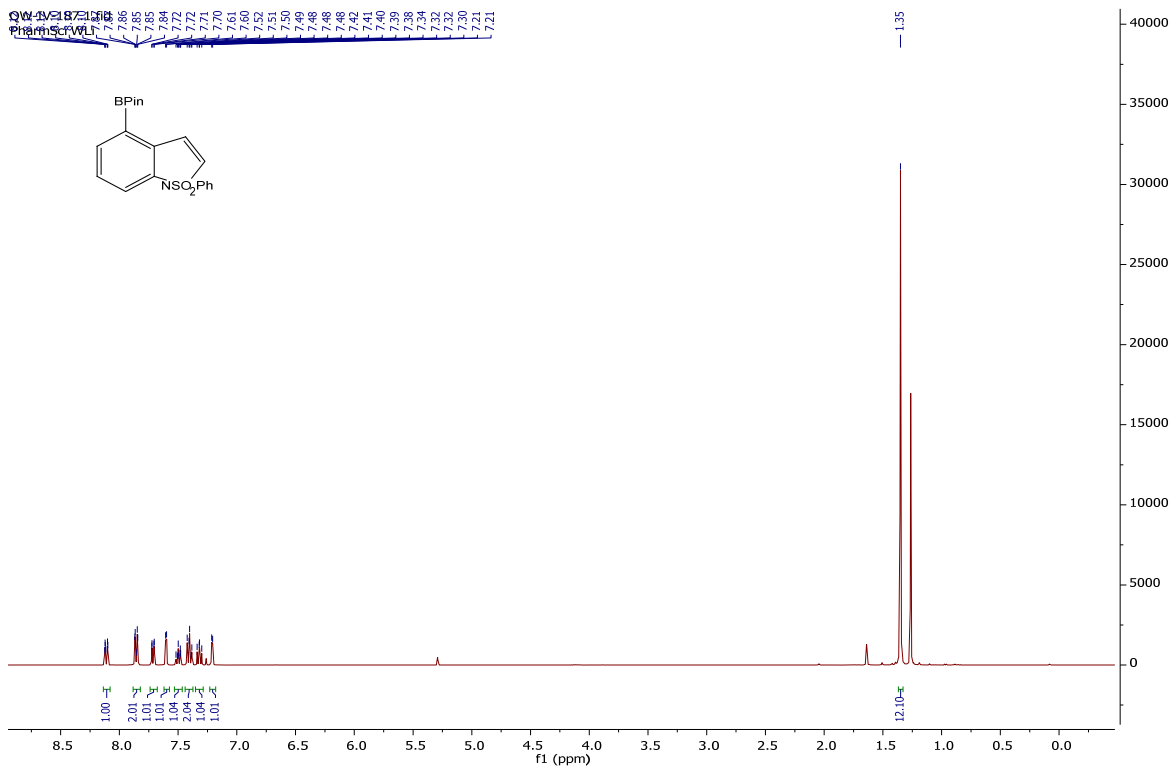

<sup>1</sup>H-NMR of 15

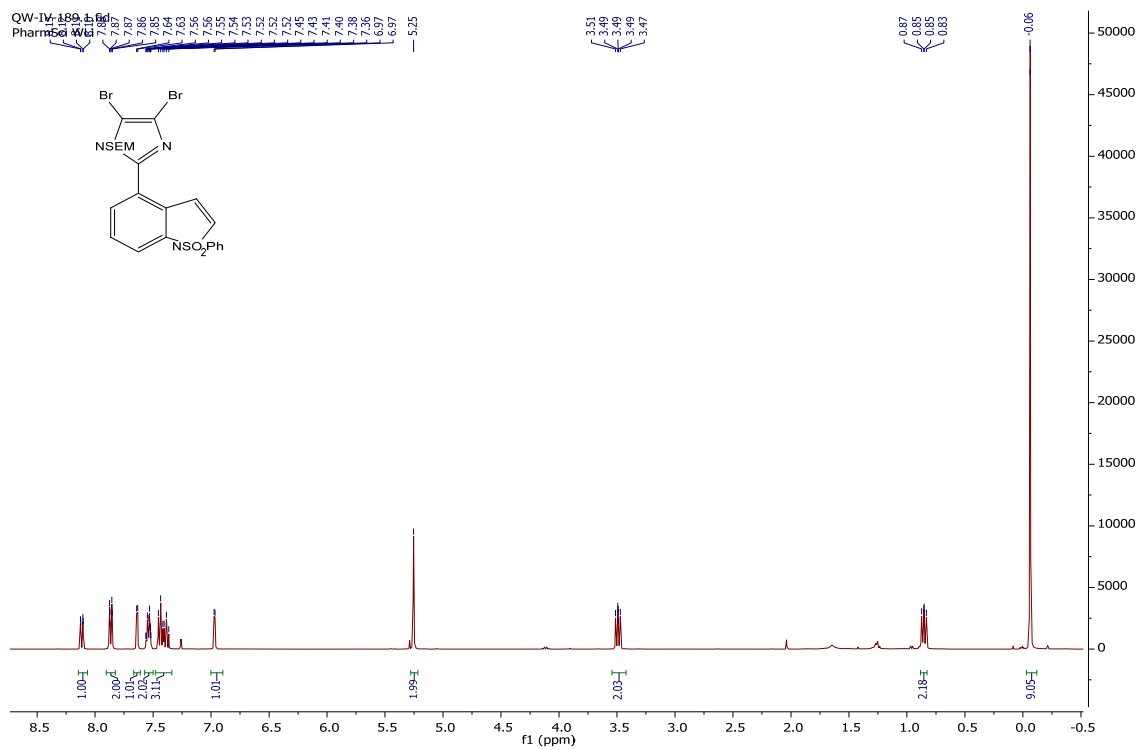

<sup>1</sup>H-NMR of 16





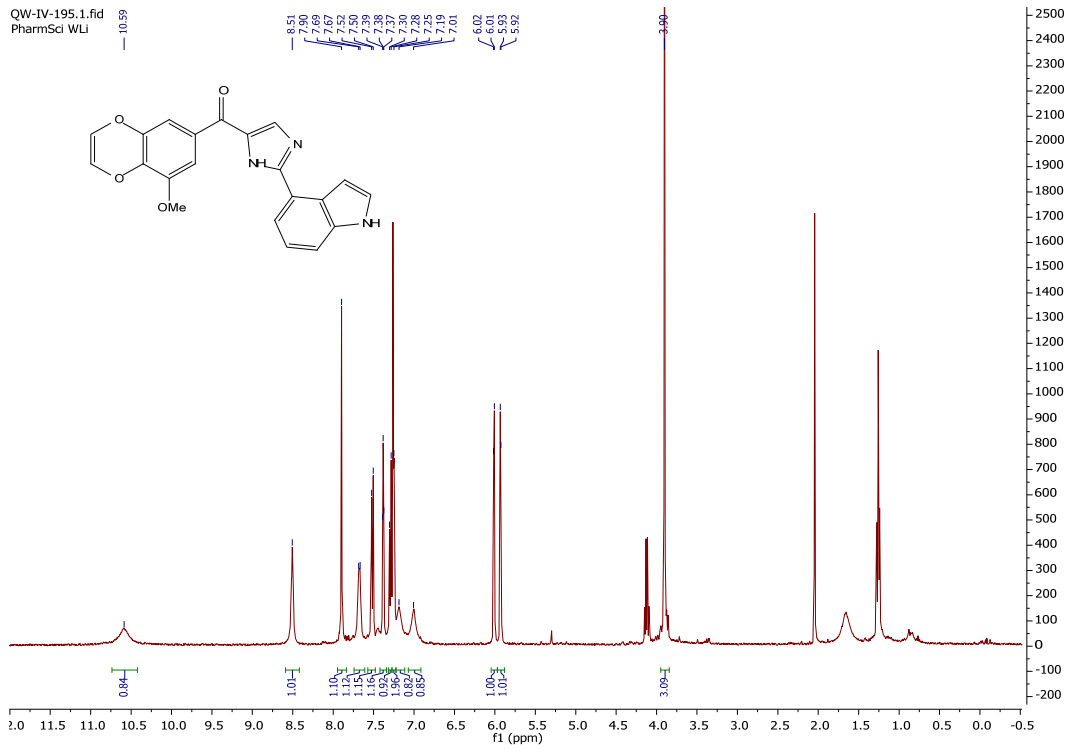

<sup>1</sup>H-NMR of 19

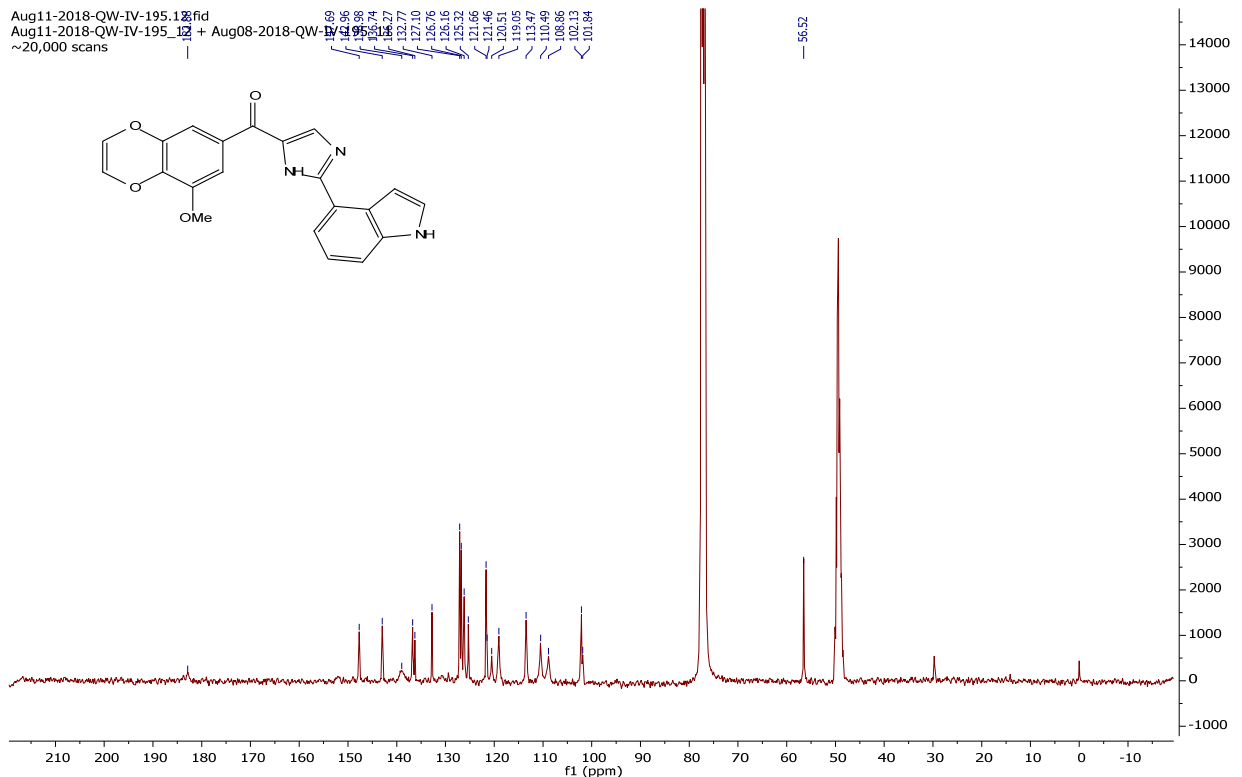

<sup>13</sup>C-NMR of 19

QW-IV-195 108 (1.983)

1: TOF MS ES+  
3.00e7

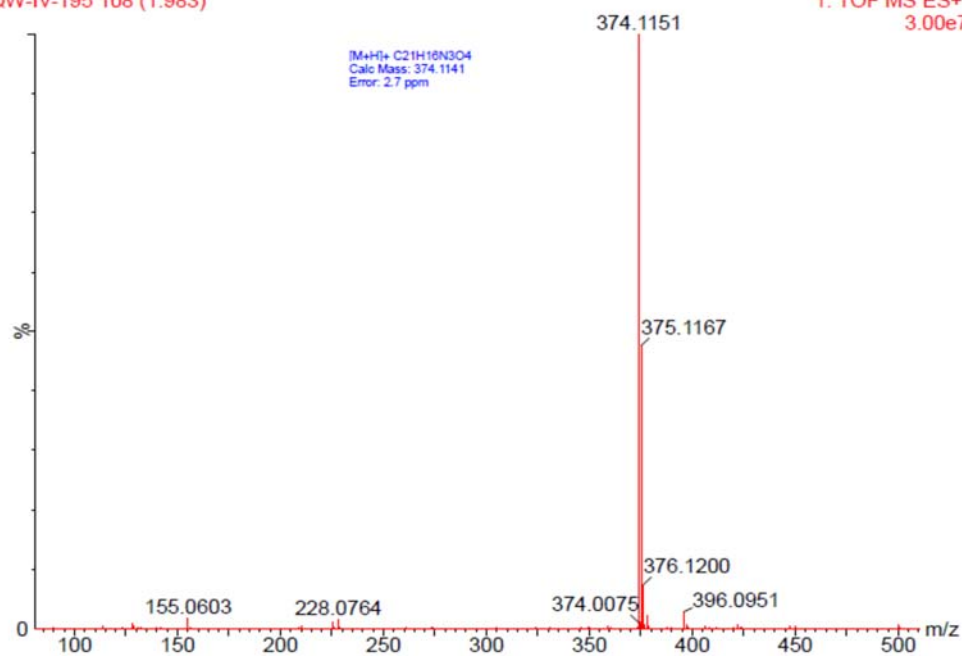

HR-MS of 19

ch-1-81.1.fid  
Wii

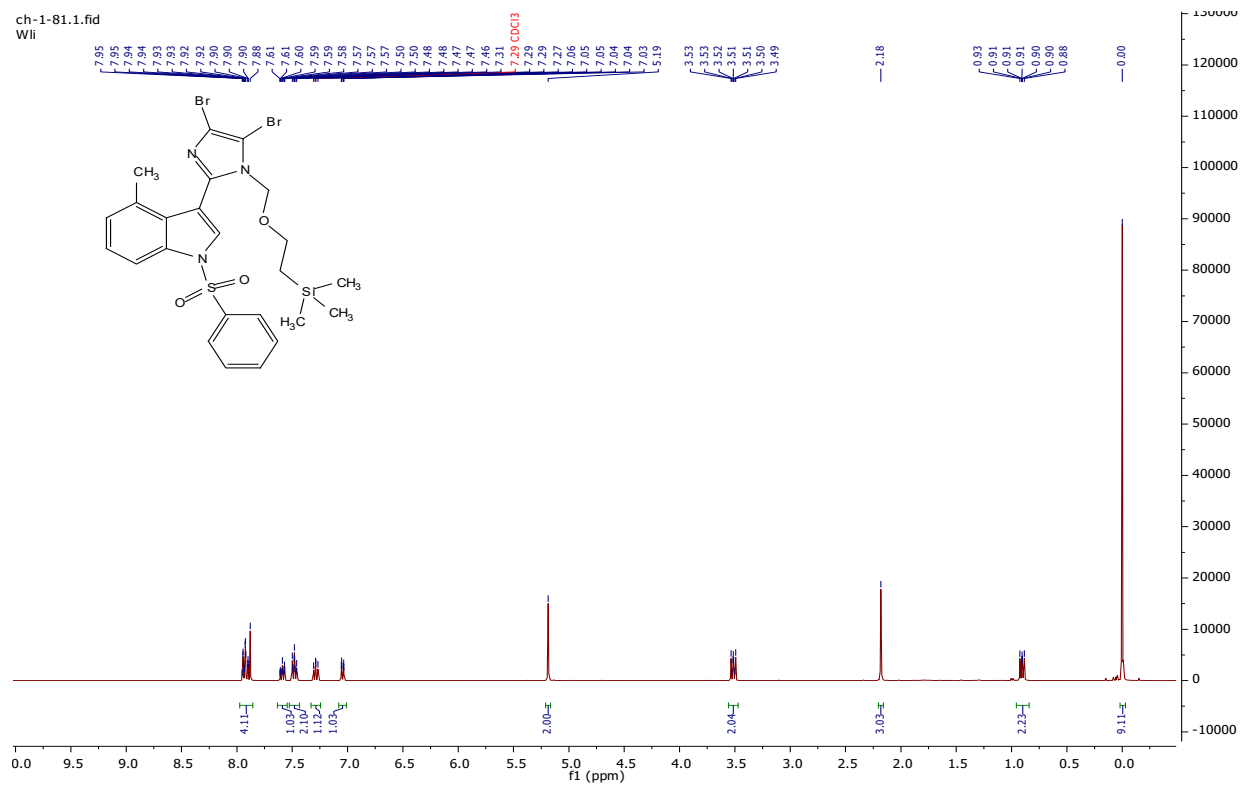

<sup>1</sup>H-NMR of 22

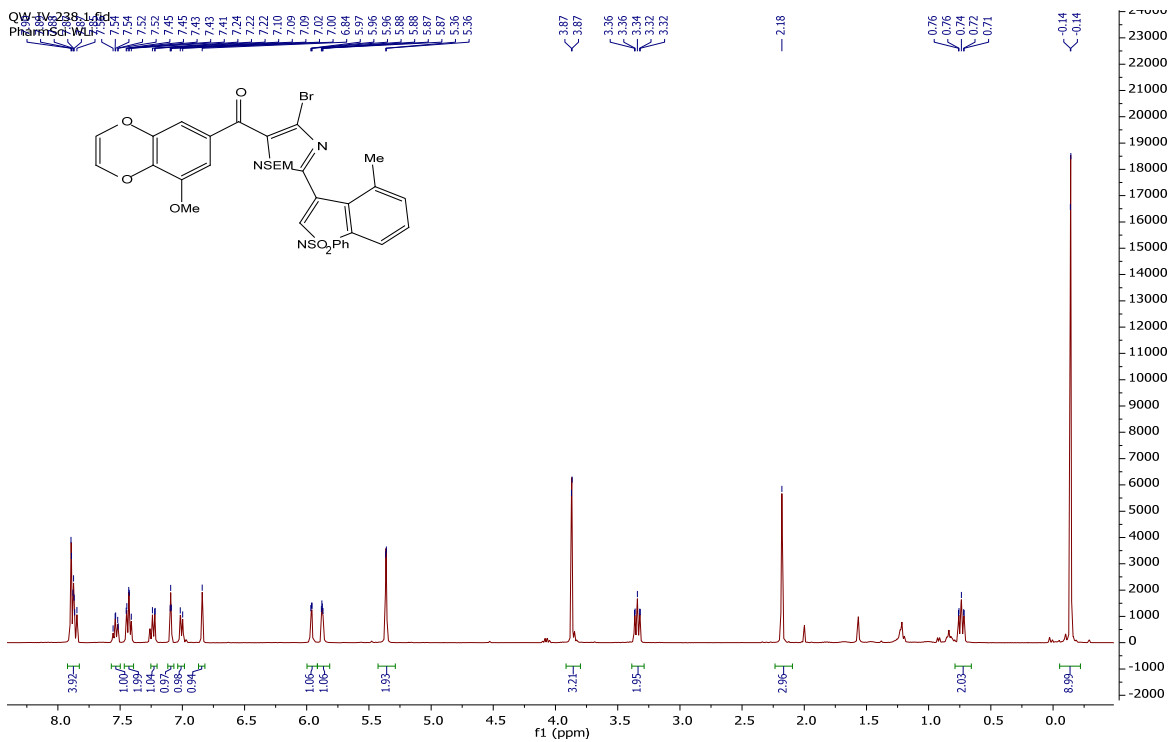

$^1\text{H-NMR}$  of 23

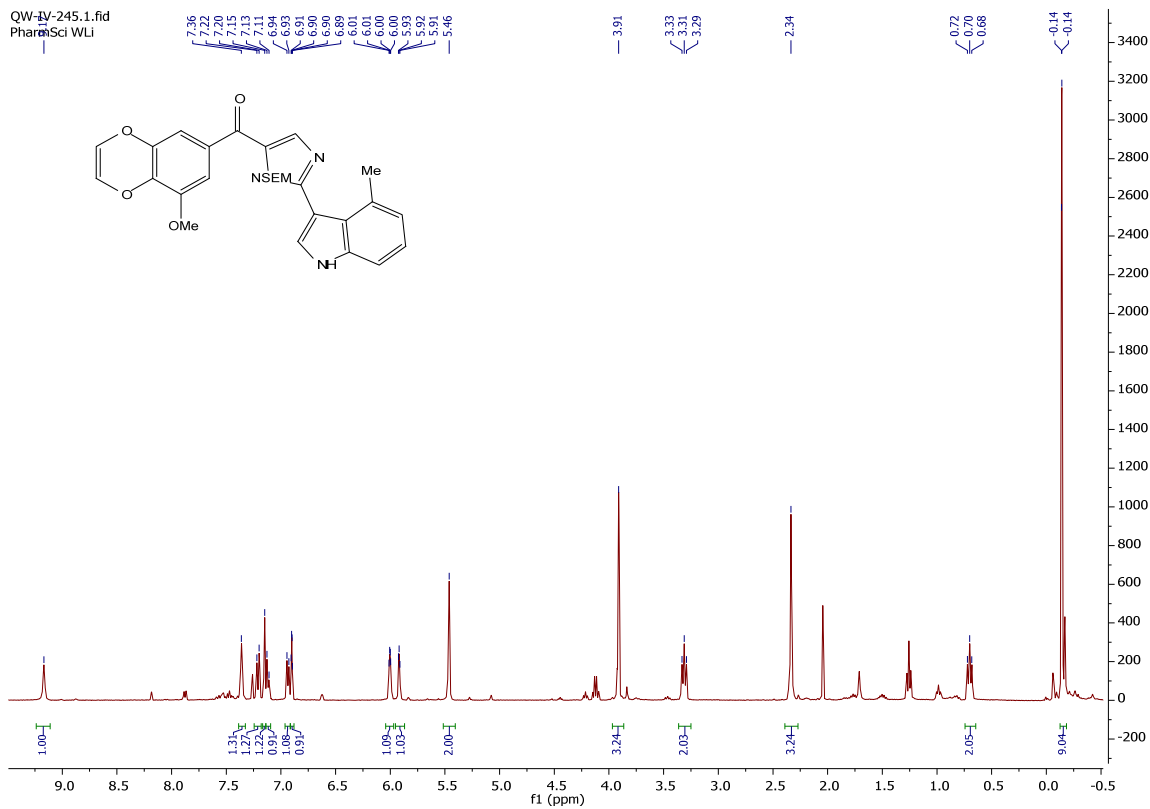

### <sup>1</sup>H-NMR of 24

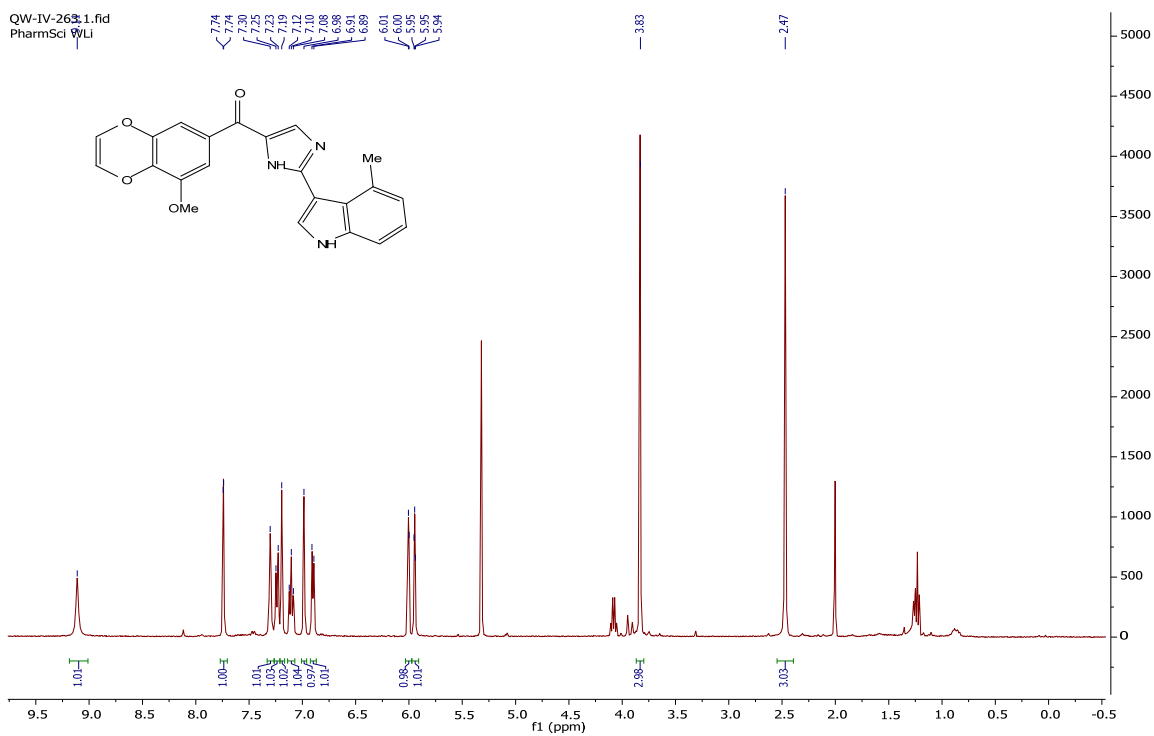

### <sup>13</sup>C-NMR of 25

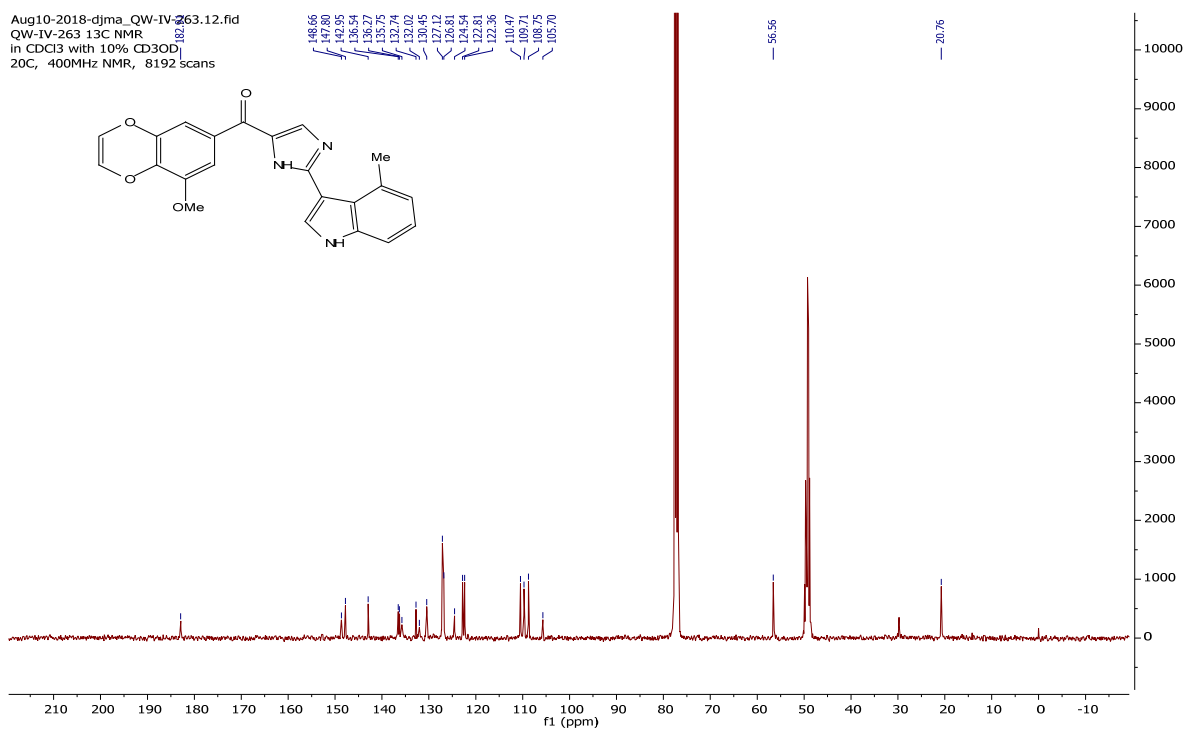

### <sup>13</sup>C-NMR of 25

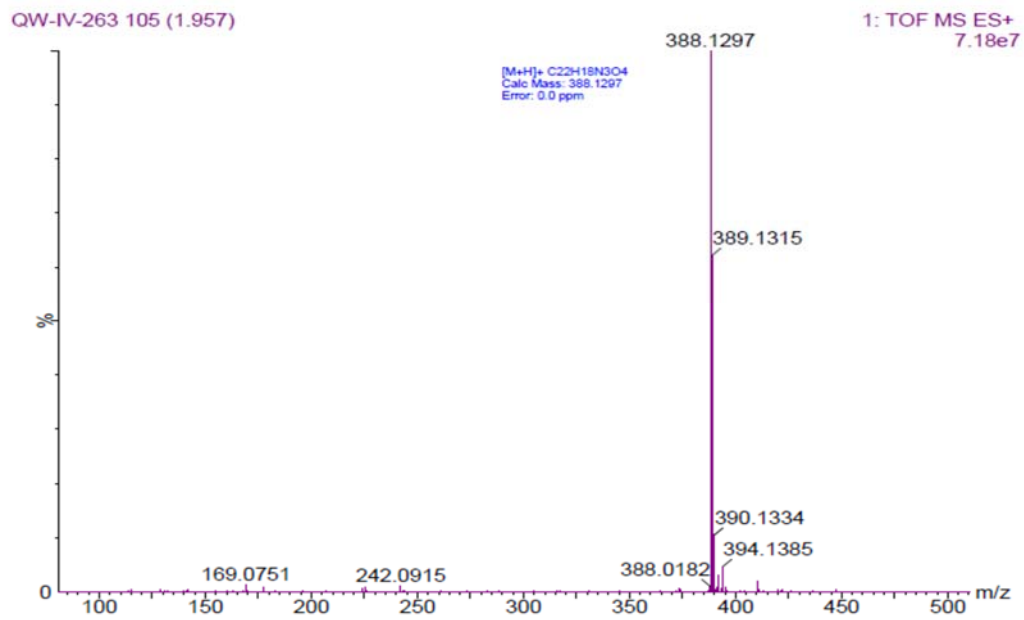

HR-MS of **25**
